# Supplementary material for: SAGA Complex Subunits in Candida albicans Differentially Regulate Filamentation, Invasiveness, and Biofilm Formation
Source: Frontiers journal article supplement (doi:10.3389/fcimb.2022.764711), 2022-03-08
Supplement: Data_Sheet_2.xlsx [file Data_Sheet_2.xlsx]

## Sheet: ngg1 mutant
Table S3. RNAseq analysis of ngg1 mutant
TOP UPREGULATED GENES
ORF	Gene names	log2FC	lfcSE	stat	pvalue	padj	Description
C3_00600W_A	IFF11	5	2.98	1.68	0.0934699	0.707374	Secreted protein required for normal cell wall structure and for virulence; member of the IFF family; Hap43p-repressed gene
C4_00450C_A	PGA10	3.41	1.64	2.08	0.0371564	0.566254	GPI anchored membrane protein; utilization of hemin and hemoglobin for Fe in host; Rim101 at ph8/hypoxia/ketoconazole/ciclopirox/hypha-induced; required for RPMI biofilm formation, Bcr1-induced in a/a biofilm; rat catheter biofilm repressed
C6_04380W_A	ALS2	3.12	1.25	2.5	0.0124219	0.354372	ALS family protein; role in adhesion, biofilm formation, germ tube induction; expressed at infection of human buccal epithelial cells; putative GPI-anchor; induced by ketoconazole, low iron and at cell wall regeneration; regulated by Sfu1p
CR_09140C_A		2.97	0.65	4.53	5.82265e-06	0.00249376	Protein with a role in directing meiotic recombination events to homologous chromatids; induced by ciclopirox olamine; positively regulated by Sfu1; Hog1, fluconazole-repressed; Hap43-induced; Spider biofilm induced
C6_04130C_A	ALS4	2.75	0.62	4.42	9.91767e-06	0.00330369	GPI-anchored adhesin; role in adhesion, germ tube induction; growth, temperature regulated; expressed during infection of human buccal epithelial cells; repressed by vaginal contact; biofilm induced; repressed during chlamydospore formation
C1_13480W_A	HSP70	2.6	0.52	4.99	5.9009e-07	0.000353818	Putative hsp70 chaperone; role in entry into host cells; heat-shock, amphotericin B, cadmium, ketoconazole-induced; surface localized in yeast and hyphae; antigenic in host; farnesol-downregulated in biofilm; Spider biofilm induced
C6_03710W_A	ALS9	2.5	0.69	3.64	0.000273403	0.0409831	ALS family cell-surface glycoprotein; expressed during infection of human epithelial cells; confers laminin adhesion to S. cerevisiae; highly variable; putative GPI-anchor; Hap43-repressed
C2_07630C_A		2.41	1.31	1.84	0.0654091	0.640284	Possible stress protein; increased transcription associated with CDR1 and CDR2 overexpression or fluphenazine treatment; regulated by Sfu1, Nrg1, Tup1; stationary phase enriched protein; Spider biofilm induced
CR_08800W_A	ITS2	2.37	0.42	5.71	1.14288e-08	1.71318e-05	Non-coding region in the 55 copies of rDNA repeat, between RDN58 and RDN25; in S. cerevisiae it is transcribed as part of the 35S precursor that is processed during rRNA maturation to yield 18S, 5.8S, and 25S rRNA species
CR_08790W_A	RDN58	2.18	0.41	5.39	7.18341e-08	5.38397e-05	5.8S ribosomal RNA; component of the large (60S) ribosomal subunit; encoded in about 55 copies of the rDNA repeat on Chromosome R
C2_09220W_A	DDR48	2.14	0.54	3.93	8.57383e-05	0.0197726	Immunogenic stress-associated protein; filamentation regulated; induced by benomyl/caspofungin/ketoconazole or in azole-resistant strain; Hog1, farnesol, alkaline repressed; stationary phase enriched; Spider, flow model biofilm induced
CR_08890C_A	ASR2	2.1	0.64	3.31	0.000948878	0.0980943	Adenylyl cyclase and stress responsive protein; induced in cyr1 or ras1 mutant; stationary phase enriched protein; Spider biofilm induced
C2_05180W_A	WH11	2.07	0.54	3.83	0.000127594	0.0255017	White-phase yeast transcript; expression in opaques increases virulence/switching; mutant switches as WT; Hap43, hypoxia, ketoconazol induced; required for RPMI biofilm; Bcr1-induced in RPMI a/a biofilm; rat catheter, Spider biofilm induced
C2_06870C_A	PST1	2.05	0.6	3.42	0.000618783	0.0769277	Flavodoxin-like protein involved in oxidative stress protection and virulence; putative 1,4-benzoquinone reductase; hyphal-induced; regulated by Cyr1, Ras1, Efg1, Nrg1, Rfg1, Tup1; Hap43-induced; Spider biofilm induced
CR_08780W_A	ITS1	2.05	0.47	4.32	1.56681e-05	0.00469729	Non-coding region in the 55 copies of rDNA repeat, between RDN18 and RDN58; in S. cerevisiae it is transcribed as part of the 35S precursor that is processed during rRNA maturation to yield 18S, 5.8S, and 25S rRNA species
CR_08510W_A	PGA13	2.02	0.49	4.15	3.29066e-05	0.00896854	GPI-anchored cell wall protein involved in cell wall synthesis; required for normal cell surface properties; induced in oralpharyngeal candidasis; Spider biofilm induced; Bcr1-repressed in RPMI a/a biofilms
CR_00200W_A	PCK1	2.01	0.45	4.49	7.22457e-06	0.00270741	Phosphoenolpyruvate carboxykinase; glucose, C-source, yeast-hypha, Hap43 regulated; fluconazole, phagocytosis, H2O2, oral candidasis, Spider/rat catheter/flow model biofilm induced; repressed in biofilm by Bcr1, Tec1, Ndt80, Rob1, Brg1
C1_07330W_A	RME1	1.98	0.62	3.19	0.00142476	0.129438	Zinc finger protein; controls meiosis in S. cerevisae; white-specific transcript; upregulation correlates with clinical development of fluconazole resistance; Upc2-regulated in hypoxia; flow model biofilm induced; Spider biofilm repressed
C3_00030C_A		1.95	0.57	3.39	0.000692811	0.0769277	Protein with a predicted DEAD-like DNA/RNA helicase domain; shows colony morphology-related gene regulation by Ssn6; overlaps orf19.5472; Spider biofilm repressed
C2_07570W_A	RNR22	1.93	0.62	3.11	0.00185941	0.146697	Putative ribonucleoside diphosphate reductase;colony morphology-related gene regulation by Ssn6; transcript regulated by tyrosol and cell density; Hap43-repressed; Spider biofilm induced
C1_08590C_A	ERG1	1.86	0.59	3.13	0.00172601	0.146697	Squalene epoxidase, epoxidation of squalene to 2,3(S)-oxidosqualene; ergosterol biosynthesis; allylamine antifungal drug target; NADH reducing cofactor but S. cerevisiae Erg1 uses NADPH; flow model biofilm induced; Spider biofilm repressed
CR_08810W_A	RDN25	1.86	0.4	4.62	3.92101e-06	0.0019592	25S ribosomal RNA; component of the large (60S) ribosomal subunit; encoded in about 55 copies of the rDNA repeat on Chromosome R; in some strains the gene may contain the self-splicing group I intron (LSU)
CR_06570C_A		1.82	0.63	2.87	0.00416384	0.204642	Protein of unknown function; Spider biofilm induced
C2_05700W_A	OSM1	1.78	0.55	3.24	0.00119482	0.11194	Putative flavoprotein subunit of fumarate reductase; soluble protein in hyphae; caspofungin repressed; stationary phase enriched protein; flow model biofilm induced; Spider biofilm repressed
C3_00010C_A		1.77	0.59	3	0.00268146	0.169679	Protein of unknown function; induced by Mnl1 under weak acid stress; transcript detected on high-resolution tiling arrays; Spider biofilm repressed
C2_02860W_A	SUR2	1.74	0.58	2.98	0.00291274	0.178212	Putative ceramide hydroxylase; predicted enzyme of sphingolipid biosynthesis; regulated by Tsa1, Tsa1B under H2O2 stress conditions; Spider and flow model biofilm induced
C5_02080C_A	HSP12	1.74	0.58	3.01	0.00261112	0.169679	Heat-shock protein; induced by osmotic/oxidative/cadmium stress, fluphenazine treatment, low iron, CDR1 and CDR2 overexpression, or ssn6 or ssk1 null mutation; overexpression increases resistance to farnesol and azoles
C6_01650C_A	FMP27	1.74	0.49	3.57	0.000361812	0.051653	Putative mitochondrial protein; mRNA binds She3
C5_03510C_A		1.73	0.46	3.79	0.000148268	0.0277817	Protein of unknown function; mRNA binds to She3; Hap43-repressed; rat catheter and flow model biofilm induced
C2_03320W_A	CHK1	1.72	0.57	3.02	0.00251151	0.167323	Histidine kinase; 2-component signaling, cell wall synthesis; hyphal growth defect; avirulent in mouse, not rat vaginal infection; phagocytosis rate increased; Spider biofilm induced; required for RPMI biofilm; Bcr1-induced in a/a biofilm
C3_00550C_A	HRK1	1.72	0.59	2.92	0.00353822	0.192751	Putative serine/threonine kinase; predicted role in cellular ion homeostasis; Spider biofilm repressed
C5_02110W_A		1.71	0.57	3	0.00271667	0.169679	Putative heat shock protein; decreased expression in hyphae; transcription is increased in populations of cells exposed to fluconazole over multiple generations; overexpression increases resistance to farnesol and azoles
C3_01540W_A		1.68	0.49	3.4	0.000678843	0.0769277	Plasma-membrane-localized protein; filament induced; Hog1, ketoconazole, fluconazole and hypoxia-induced; regulated by Nrg1, Tup1, Upc2; induced by prostaglandins; flow model biofilm induced; rat catheter and Spider biofilm repressed
CR_10840C_A	XYL2	1.68	0.61	2.74	0.00614509	0.258407	D-xylulose reductase; immunogenic in mice; soluble protein in hyphae; induced by caspofungin, fluconazole, Hog1 and during cell wall regeneration; Mnl1-induced in weak acid stress; stationary phase enriched; flow model biofilm induced
C1_06940C_A	ATC1	1.67	0.63	2.63	0.00850476	0.304209	Cell wall acid trehalase; catalyzes hydrolysis of the disaccharide trehalose; similar to S. cerevisiae vacuolar acid trehalase (Ath1p); Hap43p-repressed gene
C1_05300C_A	PRD1	1.65	0.5	3.29	0.00100324	0.100257	Putative proteinase; transcript regulated by Nrg1, Mig1, and Tup1; Hogp-induced; stationary phase enriched protein; Hap43-repressed; rat catheter biofilm repressed
C1_09250W_A	CRP1	1.65	0.56	2.93	0.00336097	0.190117	Copper transporter; CPx P1-type ATPase; mediates Cu resistance; similar to Menkes and Wilson disease proteins; copper-induced; Tbf1-activated; suppresses Cu sensitivity of S. cerevisiae cup1 mutant; flow model biofilm induced
C1_11200W_A		1.65	0.49	3.4	0.000675273	0.0769277	Predicted mucin-like protein; ketoconazole-induced; fluconazole-repressed; induced in cyr1 mutant; colony morphology-related gene regulation by Ssn6; flow model biofilm induced; Spider biofilm induced
C3_00480C_A	DOT5	1.61	0.58	2.76	0.00576217	0.250362	Putative nuclear thiol peroxidase; alkaline downregulated; sumoylation target; Spider and flow model biofilm induced
C3_04060C_A	HEM13	1.59	0.56	2.82	0.0048275	0.232071	Coproporphyrinogen III oxidase; antigenic; on yeast cell surface, not hyphae; iron-regulated expression; Hap43, macrophage-repressed; farnesol-induced; possibly essential; flow model biofilm induced; rat catheter, Spider biofilm repressed
C1_09690W_A	MLS1	1.58	0.56	2.81	0.00495818	0.232071	Malate synthase; glyoxylate cycle enzyme; no mammalian homolog; regulated upon white-opaque switch; phagocytosis, strong oxidative stress induced; stationary phase enriched; flow model biofilm repressed; rat catheter, Spider biofilm induced
C4_02100C_A	GPI14	1.58	0.68	2.34	0.0191825	0.439	Catalytic subunit of glycosylphosphatidylinositol-alpha 1,4 mannosyltransferase I, involved in GPI anchor biosynthesis; regulated by Tsa1p, Tsa1Bp under H2O2 stress conditions
CR_05340C_A	IFE2	1.56	0.54	2.9	0.00368476	0.192751	Putative alcohol dehydrogenase; yeast-enriched transcript; Efg1-regulated; induced by prostaglandins, Hog1, fluconazole; rat catheter biofilm induced
C4_02110W_A		1.53	0.62	2.49	0.0129372	0.354372	Protein of unknown function; Hap43-repressed gene
C1_01930W_A		1.52	0.63	2.43	0.0153064	0.395591	Protein of unknown function; regulated by Nrg1, Tup1; Spider and flow model biofilm induced
C4_05590W_A		1.52	0.5	3.05	0.00228696	0.167323	Ortholog of S. cerevisiae : YPR117W, C. glabrata CBS138 : CAGL0D04510g, C. dubliniensis CD36 : Cd36_45200, C. parapsilosis CDC317 : CPAR2_500480 and Candida tenuis NRRL Y-1498 : CANTEDRAFT_120679
C4_01250W_A	NAT4	1.5	0.6	2.49	0.012948	0.354372	Putative histone acetyltransferase; involved in regulation of white-opaque switch; early-stage flow model biofilm induced; Spider biofilm induced
C5_04810W_A	PFK1	1.5	0.55	2.74	0.00622426	0.258407	Phosphofructokinase alpha subinit; activated by fructose 2,6-bisphosphate, AMP, ATP inhibited; activity reduced on hyphal induction; phagocytosis-repressed; fluconazole, flow model biofilm induced; rat catheter and Spider biofilm repressed
TOP DOWNREGULATED GENES
ORF	Gene Names	log2FC	lfcSE	stat	pvalue	padj	Description
C2_04280W_A		-4.59	0.82	-5.58	2.46431e-08	2.46267e-05	Ortholog(s) have protein serine/threonine kinase activity, protein serine/threonine/tyrosine kinase activity, protein tyrosine kinase activity
C1_13870W_A	MET3	-2.41	0.6	-3.99	6.56084e-05	0.0163912	ATP sulfurlyase; sulfate assimilation; repressed by Met, Cys, Sfu1, or in fluconazole-resistant isolate; Hog1, caspofungin, white phase-induced; induced on biofilm formation, even in presence of Met and Cys; Spider, F-12/CO2 biofilm induced
C5_02600W_A	PUT1	-2.13	0.55	-3.84	0.000120562	0.0255017	Putative proline oxidase; alkaline upregulated by Rim101; flow model biofilm induced; Spider biofilm induced
CR_02020C_A	OPT1	-2.02	0.33	-6.11	9.92889e-10	2.97668e-06	Oligopeptide transporter; transports 3-to-5-residue peptides; alleles are distinct, one has intron; suppresses S. cerevisiae ptr2-2 mutant defects; induced by BSA or peptides; Stp3p, Hog1p regulated; flow model biofilm induced
CR_09920W_A		-1.67	0.54	-3.12	0.0017832	0.146697	Predicted amino acid transport domain; transcript upregulated in clinical strains from HIV+ patients with oral candidiasis; alkaline upregulated by Rim101; rat catheter, Spider and flow model biofilm induced
C1_13720W_A		-1.63	0.47	-3.5	0.000464618	0.0633148	Ortholog of S. cerevisiae : KEL3, C. glabrata CBS138 : CAGL0A01067g, C. dubliniensis CD36 : Cd36_12710, C. parapsilosis CDC317 : CPAR2_201590 and Candida tenuis NRRL Y-1498 : cten_CGOB_00106
C2_06680W_A	FRP3	-1.59	0.42	-3.77	0.00016318	0.0287774	Putative ammonium transporter; upregulated in the presence of human neutrophils; fluconazole-downregulated; repressed by nitric oxide; Spider biofilm induced; rat catheter biofilm repressed
CR_01860W_A	OPT9	-1.57	0.46	-3.43	0.000604977	0.0769277	Probable pseudogene similar to fragments of OPT1 oligopeptide transporter gene; decreased expression in hyphae compared to yeast-form cells; transcriptionally induced upon phagocytosis by macrophage
C1_13760W_A	AGM1	-1.56	0.48	-3.26	0.00111645	0.107972	Phosphoacetylglucosamine mutase (N-acetylglucosamine-phosphate mutase); enzyme of UDP-N-acetylglucosamine (UDP-GlcNAc) biosynthesis
C5_04490C_A	CAR1	-1.5	0.55	-2.72	0.00660301	0.258407	Arginase; arginine catabolism; transcript regulated by Nrg1, Mig1, Tup1; colony morphology-related regulation by Ssn6; alkaline induced; protein decreased in stationary phase; sumoylation target; flow model biofilm induced
C5_04880C_A	PUT2	-1.5	0.4	-3.72	0.000196314	0.0326973	Putative delta-1-pyrroline-5-carboxylate dehydrogenase; alkaline upregulated; protein present in exponential and stationary growth phase yeast cultures; flow model biofilm induced; Spider biofilm induced
C3_07300W_A	NOP13	-1.41	0.63	-2.26	0.0238867	0.483866	Ortholog of S. cerevisiae Nop13; a nucleolar protein found in preribosomal complexes; Hap43-induced gene; rat catheter biofilm induced
CR_06660W_A	SEO1	-1.4	0.6	-2.34	0.0190542	0.439	Protein with similarity to permeases; Sfu1-repressed; flucytosine induced; induced by Mnl1 under weak acid stress; flow model biofilm repressed
C1_14230C_A	IRR1	-1.38	0.55	-2.51	0.0119057	0.343205	Putative cohesin complex subunit; cell-cycle regulated periodic mRNA expression
C1_13780W_A	MYO2	-1.36	0.43	-3.13	0.00173853	0.146697	Class V myosin; nonessential; sole class V myosin in C. albicans; required for WT actin cytoskeletal polarity, nuclear organization, migration, hyphal growth; conserved myosin ATPase/tail domains; Hap43-induced; flow model biofilm repressed
C1_13900C_A	LCB2	-1.32	0.4	-3.31	0.00093807	0.0980943	Putative serine palmitoyltransferase component; mutation confers hypersensitivity to aureobasidin A
C1_14090W_A		-1.3	0.48	-2.72	0.00657835	0.258407	Ortholog(s) have chaperone binding, unfolded protein binding activity and role in chaperone-mediated protein complex assembly, protein folding, protein import into mitochondrial intermembrane space, protein refolding
C1_14240W_A		-1.3	0.35	-3.71	0.000208812	0.0329483	Putative RSC chromatin remodeling complex component; possibly an essential gene, disruptants not obtained by UAU1 method
C1_14100W_A	YPT52	-1.25	0.48	-2.61	0.00916285	0.317846	Rab-family GTPase involved in vacuolar trafficking, colocolizes with Vps1p and Ypt53p in late endosome
C1_13830C_A	PDX1	-1.23	0.4	-3.12	0.00182624	0.146697	Pyruvate dehydrogenase complex protein X; essential component of the mitochondrial pyruvate dehydrogenase complex; role in the respiratory pathway; protein present in exponential and stationary growth phase yeast; Spider biofilm repressed
C1_14320C_A		-1.21	0.44	-2.76	0.0057261	0.250362	Putative fumarylacetoacetate hydrolase; induced by nitric oxide independent of Yhb1; regulated by Sef1, Sfu1, Hap43; flow model biofilm induced
C1_04660W_A	DUR1,2	-1.19	0.57	-2.06	0.0390257	0.570727	Urea amidolyase; hydrolyzes urea to CO2; use of urea as N source and for hyphal switch in macrophage; regulated by Nrg1/Hap43; required for virulence; promotes mouse kidney and brain colonization; rat catheter and flow model biofilm induced
C1_13840W_A		-1.18	0.42	-2.81	0.00498627	0.232071	Ortholog(s) have inorganic cation transmembrane transporter activity and role in cellular cobalt ion homeostasis, cellular manganese ion homeostasis, cobalt ion transport, manganese ion transport
C1_14120C_A	RBE1	-1.18	0.44	-2.71	0.00672306	0.258407	Pry family cell wall protein; Rim101, Efg1, Ssn6, alkaline repressed; O-glycosylation; no GPI anchor predicted; ketoconazol induced; regulated by Sef1, Sfu1, Hap4; flow model biofilm induced; rat catheter and Spider biofilm repressed
C1_04640W_A		-1.16	0.52	-2.24	0.0250884	0.493941	Ortholog(s) have hydrolase activity, acting on ester bonds, triglyceride lipase activity, role in lipid homeostasis and lipid droplet localization
C4_02020W_A	CAT2	-1.15	0.52	-2.21	0.0271039	0.504705	Major carnitine acetyl transferase; intracellular acetyl-CoA transport; localized in peroxisomes and mitochondria; induced in macrophages; Hog1-repressed; stationary phase enriched; farnesol-upregulated in biofilm; Spider biofilm induced
C1_14170W_A		-1.14	0.39	-2.95	0.00313123	0.187749	Ortholog(s) have ubiquitin-protein transferase activity and role in histone catabolic process, histone ubiquitination
CR_05660W_A	SDA1	-1.14	0.53	-2.15	0.0315927	0.544698	Predicted nuclear protein involved in actin cytoskeleton organization, passage through Start, 60S ribosome biogenesis; rat catheter biofilm induced; Hap43-induced
C1_14080W_A		-1.13	0.41	-2.76	0.00574485	0.250362	Nucleolar protein; component of the small subunit processome containing the U3 snoRNA; involved in pre-18S rRNA processing; flow model biofilm repressed
C2_05440W_A	PEX6	-1.13	0.45	-2.52	0.0116697	0.339667	Ortholog(s) have ATPase activity, protein heterodimerization activity
C2_06470W_A	RTA2	-1.11	0.49	-2.25	0.0244227	0.491405	Flippase involved in sphingolipid long chain base release; mediates calcineurin-dependent ER stress response and resistance to azoles; Plc1p, Ca2+, calcineurin-regulated;
C6_03790C_A	HGT10	-1.11	0.63	-1.76	0.0785539	0.676791	Glycerol permease involved in glycerol uptake; member of the major facilitator superfamily; induced by osmotic stress, at low glucose in rich media, during cell wall regeneration; 12 membrane spans; Hap43p-induced gene
CR_08990C_A	SLP3	-1.11	0.57	-1.94	0.0522862	0.602324	Plasma membrane protein implicated in stress response; similar to stomatin mechanoreception proteins; overexpression induces apoptotic-like cell death; absent from hyphal cells; induced by Rgt1; rat catheter and Spider biofilm induced
C6_00960W_A	CAN1	-1.1	0.45	-2.43	0.0150873	0.393319	Basic amino acid permease; complements lysine transport mutation; 10 predicted transmembrane regions, 3 predicted N-glycosylation sites; phagocytosis by macrophages induces transcript; rat catheter, Spider and flow model biofilm induced
CR_00330C_A	PXA1	-1.1	0.67	-1.64	0.101497	0.720258	Putative peroxisomal, half-size adrenoleukodystrophy protein (ALD or ALDp) subfamily ABC family transporter
C1_06870C_A		-1.09	0.44	-2.45	0.0144203	0.382585	Ortholog of C. parapsilosis CDC317 : CPAR2_208910, Candida tenuis NRRL Y-1498 : CANTEDRAFT_114047, Debaryomyces hansenii CBS767 : DEHA2D14388g and Pichia stipitis Pignal : PICST_37629
C2_06170C_A	ECM17	-1.09	0.52	-2.1	0.0358803	0.566254	Putative sulfite reductase beta subunit; role in cell wall biogenesis; regulated by Tsa1/Tsa1B in H2O2 stress; Gcn4-regulated; Tbf1-activated; Hap43-repressed; Spider, flow, F-12/CO2 model biofilm induced
C3_03640W_A	DAL9	-1.09	0.4	-2.71	0.00668822	0.258407	Putative allantoate permease; fungal-specific (no human or murine homolog)
C6_00790C_A	CTR1	-1.08	0.61	-1.77	0.0766534	0.669114	Copper transporter; transcribed in low copper; induced Mac1, Tye7, macrophage interaction, alkaline pH via Rim101; 17-beta-estradiol repressed; complements S. cerevisiae ctr1 ctr3 copper transport mutant; flow model/Spider biofilm induced
C1_13670W_A	OSM2	-1.07	0.52	-2.05	0.040362	0.578128	Putative mitochondrial fumarate reductase; regulated by Ssn6p, Gcn2p, and Gcn4p; Hog1p-downregulated; stationary phase enriched protein; Hap43p-repressed gene
C1_13880C_A		-1.07	0.46	-2.32	0.0205279	0.43959	C2H2 transcription factor; Spider biofilm induced
CR_01280C_A		-1.06	0.55	-1.91	0.0566022	0.606325	Ortholog(s) have role in intracellular sterol transport and extracellular region, fungal-type vacuole lumen localization
C1_14220C_A	FTR2	-1.05	0.36	-2.91	0.00367094	0.192751	High-affinity iron permease; probably interacts with ferrous oxidase; regulated by iron level, ciclopirox olamine, amphotericin B, caspofungin; complements S. cerevisiae ftr1 iron transport defect; Hap43-repressed; Spider biofilm induced
C6_01060C_A	CAN2	-1.05	0.44	-2.39	0.0166985	0.415048	Basic amino acid permease; arginine metabolism; regulated by Nrg1/Tup1; caspofungin, flucytosine induced; colony morphology-related regulation by Ssn6; Hap43-repressed; rat catheter and Spider biofilm induced; promoter bound by Efg1
CR_05520W_A	NOC2	-1.05	0.56	-1.88	0.0604551	0.6207	Putative nucleolar complex protein; Hap43-induced; transposon mutation affects filamentous growth; mutation confers hypersensitivity to 5-fluorouracil (5-FU), tubercidin (7-deazaadenosine); repressed in core stress response
C4_00200C_A	MET15	-1.04	0.52	-1.98	0.0472308	0.582814	O-acetylhomoserine O-acetylserine sulfhydrylase; sulfur amino acid synthesis; immunogenic; Hog1, adherence-induced; brown color of mutant in Pb(2+) medium a visual selection; chlamydospore formation induced, F-12/CO2 biofilm induced
C1_14340C_A	RIM101	-1.01	0.33	-3.03	0.00248377	0.167323	Transcription factor; alkaline pH response; required for alkaline-induced hyphal growth; role in virulence in mice; activated by C-terminal proteolytic cleavage; mediates both positive and negative regulation; Spider biofilm induced
CR_08340W_A	CYS3	-1.01	0.51	-1.98	0.0473528	0.582814	Cystathionine gamma-lyase; induced by alkaline, amphotericin B, cadmium stress, oxidative stress via Cap1; possibly adherence-induced; Hog1 regulated; reduced levels in stationary phase yeast cells; Spider and flow model biofilm induced

## Sheet:  spt7 mutant
Table S4. RNA Seq analysis of spt7 mutant		mutant
TOP UPREGULATED GENES
ORF	Gene Name	log2FC	lfcSE	stat	pvalue	padj	Descriptionn
C7_00120W_A		10.16	1.49	6.81	9.66e-12	3.51e-10	Putative mitochondrial outer membrane protein membrane fission effector; possibly an essential gene, disruptants not obtained by UAU1 method
C4_03570W_A	HWP1	9.3	1.53	6.06	1.34e-09	3.54e-08	Hyphal cell wall protein; host transglutaminase substrate; opaque-, a-specific, alpha-factor induced; at MTLa side of conjugation tube; virulence complicated by URA3 effects; Bcr1-repressed in RPMI a/a biofilms; Spider biofilm induced
C7_02000C_A		9.14	1.54	5.93	2.96e-09	7.29e-08	Putative allantoate permease; fungal-specific (no human or murine homolog)
C3_04160W_A	DAL8	9.08	1.56	5.83	5.39e-09	1.27e-07	Putative allantoate permease; fungal-specific (no human or murine homolog)
C6_02890C_A	HPD1	8.9	1.56	5.72	1.06e-08	2.38e-07	3-hydroxypropionate dehydrogenase; involved in degradation of toxic propionyl-CoA; rat catheter and Spider biofilm induced
C3_06450W_A	GLG2	8.19	1.63	5.03	4.97e-07	8.48e-06	Putative self-glucosylating initiator of glycogen synthesis; expression regulated upon white-opaque switch; hypha-induced; Spider biofilm induced
C2_08170W_A		7.98	1.64	4.86	1.16e-06	1.83e-05	Putative sterol deacetylase; flow model biofilm induced; rat catheter biofilm repressed
C2_02570W_A		7.57	1.71	4.42	9.72e-06	0.000125	Predicted membrane transporter; member of the drug:proton antiporter (12 spanner) (DHA1) family, major facilitator superfamily (MFS); mRNA binds She3
C5_03050C_A	PGA58	7.4	1.73	4.27	1.99e-05	0.000243	Putative GPI-anchored protein; transcription is positively regulated by Tbf1p
CR_00620C_A	ARG1	6.66	0.42	15.92	4.3e-57	2.49e-54	Argininosuccinate synthase; arginine synthesis; Gcn4, Rim101 regulated; induced by amino acid starvation (3-AT), benomyl treatment; stationary phase enriched protein; repressed in alkalinizing medium; rat catheter, Spider biofilm induced
CR_01220W_A		6.27	1.28	4.89	1.03e-06	1.67e-05	Putative transporter; mutation confers hypersensitivity to toxic ergosterol analog; fungal-specific (no human or murine homolog)
C7_00280W_A	HGT12	6.16	0.91	6.76	1.35e-11	4.76e-10	Glucose, fructose, mannose transporter; major facilitator superfamily; role in macrophage-induced hyphal growth; detected at germ tube plasma membrane by mass spectrometry; Snf3p-induced; 12 probable transmembrane segments
C4_04030W_A	JEN2	5.5	0.92	5.97	2.43e-09	6.09e-08	Dicarboxylic acid transporter; regulated by glucose repression; induced by Rgt1; disruptants not obtained by UAU1 method; rat catheter and Spider biofilm induced
CR_10640W_A		5.09	0.31	16.34	5.07e-60	4.89e-57	Has domain(s) with predicted antiporter activity, role in drug transmembrane transport and membrane localization
C1_01740W_A	CTN1	4.95	0.78	6.31	2.77e-10	8.38e-09	Carnitine acetyl transferase; required for growth on nonfermentable carbon sources, not for hyphal growth or virulence in mice; induced in macrophage; macrophage/pseudohyphal-repressed after 16 hr; rat catheter, Spider biofilm induced
CR_07130C_A	ALK8	4.86	1.07	4.55	5.26e-06	7.28e-05	Alkane-inducible cytochrome P450; catalyzes hydroxylation of lauric acid to hydroxylauric acid; overproduction causes fluconazole resistance in WT and causes multidrug resistance in a cdr1 cdr2 double mutant; rat catheter biofilm repressed
C5_04140W_A		4.84	1.04	4.64	3.41e-06	4.88e-05	Protein of unknown function; decreased transcription is observed upon fluphenazine treatment or in an azole-resistant strain that overexpresses CDR1 and CDR2; transcription is repressed in response to alpha pheromone in SpiderM medium
CR_08670C_A		4.53	0.52	8.62	6.61e-18	4.11e-16	Protein with an enoyl-CoA hydratase related domain; Spider biofilm induced
C6_02950C_A		4.49	1.06	4.23	2.37e-05	0.00028	Protein of unknown function; expression downregulated in an ssr1 null mutant
CR_08310C_A		4.42	0.97	4.54	5.64e-06	7.77e-05	S. pombe ortholog SPBC460.04c is a predicted sulfonate/alpha-ketoglutare dioxygenase; induced by nitric oxide; Spider biofilm induced
C4_06320C_A		4.38	0.98	4.47	7.9e-06	0.000104	Ortholog of Candida albicans WO-1 : CAWG_03194
C3_04200W_A	AFP99	4.09	0.54	7.51	5.81e-14	2.8e-12	Protein related to arginases; downregulated upon adherence to polystyrene; regulated by Gcn2p and Gcn4p
C6_02660C_A		3.96	0.89	4.46	8.17e-06	0.000107	Has domain(s) with predicted amidase activity, carbon-nitrogen ligase activity, with glutamine as amido-N-donor activity
C6_02450W_A		3.93	0.4	9.87	5.67e-23	4.31e-21	Ortholog of S. pombe SPCC550.08, an N-acetyltransferase; transcript induced during growth in the mouse cecum
C4_00080C_A		3.86	0.75	5.13	2.86e-07	5.11e-06	Protein of unknown function; Hap43-repressed; Spider biofilm induced
C1_02630C_A	EXG2	3.84	0.27	13.99	1.74e-44	4.37e-42	GPI-anchored cell wall protein, similar to S. cerevisiae exo-1,3-beta-glucosidase Exg2p; predicted Kex2p substrate; induced during cell wall regeneration; possibly an essential gene, disruptants not obtained by UAU1 method; Hap43p-repressed
C7_02920W_A		3.74	0.33	11.22	3.35e-29	3.52e-27	Has domain(s) with predicted amidase activity, carbon-nitrogen ligase activity, with glutamine as amido-N-donor activity
C1_02270C_A		3.73	0.45	8.24	1.69e-16	9.78e-15	Putative oxidoreductase; Spider biofilm induced
C3_02360C_A		3.69	0.55	6.7	2.06e-11	7.12e-10	Has domain(s) with predicted catalytic activity, sulfuric ester hydrolase activity and role in metabolic process
C4_06910W_A		3.66	0.78	4.71	2.42e-06	3.61e-05	PDR-subfamily ABC transporter (half-size); similar to WHITE subfamily proteins; repressed by fluphenazine treatment or in an azole-resistant strain that overexpresses CDR1 and CDR2; induced by nitric oxide; rat catheter biofilm induced
C2_02080W_A		3.53	0.71	4.96	6.89e-07	1.13e-05	C/D box small nucleolar RNA (snoRNA)
CR_08510W_A	PGA13	3.5	0.27	12.95	2.3e-38	3.8e-36	GPI-anchored cell wall protein involved in cell wall synthesis; required for normal cell surface properties; induced in oralpharyngeal candidasis; Spider biofilm induced; Bcr1-repressed in RPMI a/a biofilms
C1_11950W_A		3.43	0.8	4.28	1.91e-05	0.000232	Protein of unknown function; rat catheter biofilm induced
C3_01930W_A	PXP2	3.42	0.48	7.12	1.06e-12	4.21e-11	Putative acyl-CoA oxidase; enzyme of fatty acid beta-oxidation; induced during macrophage infection; opaque specific transcript; putative peroxisome targeting signal; Spider biofilm induced
C4_01070W_A	HGT17	3.36	0.72	4.67	3.01e-06	4.39e-05	Putative MFS family glucose transporter; 20 members in C. albicans; 12 probable membrane-spanning segments; induced at low (0.2%, compared to 2%) glucose in rich media; Spider biofilm induced
C4_01550C_A	CPA1	3.25	0.65	5.02	5.08e-07	8.61e-06	Putative carbamoyl-phosphate synthase subunit; alkaline repressed; rat catheter, Spider and flow model biofilm induced
CR_01330W_A	CPA2	3.19	0.29	10.94	7.22e-28	6.96e-26	Putative arginine-specific carbamoylphosphate synthetase; protein enriched in stationary phase yeast cultures; rat catheter biofilm induced; Spider biofilm induced
C2_06590C_A	GIT1	3.18	0.53	6.04	1.53e-09	3.97e-08	Glycerophosphoinositol permease; involved in utilization of glycerophosphoinositol as a phosphate source; Rim101-repressed; virulence-group-correlated expression
C2_05950C_A	TES15	3.08	0.67	4.59	4.38e-06	6.16e-05	Putative acyl-CoA thioesterase; Hap43-repressed; Spider biofilm induced
C4_04080C_A	PGA31	3.08	0.43	7.16	7.85e-13	3.24e-11	Cell wall protein; putative GPI anchor; expression regulated upon white-opaque switch; induced by Congo Red and cell wall regeneration; Bcr1-repressed in RPMI a/a biofilms
CR_04870C_A		3.04	0.23	13.03	8.2e-39	1.48e-36	Trimethylaminobutyraldehyde dehydrogenase, the third enzyme of the carnitine biosynthesis pathway
C5_02430W_A	ZCF22	2.99	0.56	5.37	7.68e-08	1.5e-06	Predicted Zn(II)2Cys6 transcription factor
C2_06700W_A	AMO2	2.96	0.21	13.87	9.78e-44	2.36e-41	Protein similar to A. niger predicted peroxisomal copper amino oxidase; mutation confers hypersensitivity to toxic ergosterol analog; F-12/CO2 early biofilm induced
C4_02990C_A	GST2	2.94	0.27	10.98	4.52e-28	4.5e-26	Glutathione S transferase; induced by benomyl and in populations of cells exposed to fluconazole over multiple generations; regulated by Nrg1, Tup1; induced by nitric oxide; stationary phase enriched; Spider biofilm induced
C3_00010C_A		2.78	0.25	11.17	5.97e-29	6.05e-27	Protein of unknown function; induced by Mnl1 under weak acid stress; transcript detected on high-resolution tiling arrays; Spider biofilm repressed
C4_05070C_A	ARG8	2.64	0.47	5.67	1.42e-08	3.14e-07	Putative acetylornithine aminotransferase; Gcn2, Gcn4 regulated; rat catheter biofilm induced; Spider biofilm induced
C3_07330W_A		2.57	0.49	5.3	1.16e-07	2.19e-06	Predcted glucose 1-dehydrogenase (NADP+); rat catheter biofilm repressed
C4_03710C_A		2.54	0.35	7.3	2.95e-13	1.29e-11	Predicted membrane protein; rat catheter biofilm induced
CR_08800W_A	ITS2	2.53	0.19	13.37	8.88e-41	1.77e-38	Non-coding region in the 55 copies of rDNA repeat, between RDN58 and RDN25; in S. cerevisiae it is transcribed as part of the 35S precursor that is processed during rRNA maturation to yield 18S, 5.8S, and 25S rRNA species
C1_09290C_A	ARG5,6	2.5	0.25	9.93	2.96e-23	2.28e-21	Arginine biosynthetic enzyme; processed in S. cerevisiae into 2 polypeptides with acetylglutamate kinase (Arg6) activity and acetylglutamate-phosphate reductase (Arg5) activity; Gcn4 regulated; alkaline repressed; Spider biofilm induced
C4_06780C_A	OYE32	2.46	0.4	6.22	5.09e-10	1.46e-08	NAD(P)H oxidoreductase family protein; induced by nitric oxide, amphotericin B, oxidative stress via Cap1; upregulation associated with MDR1 overexpression or benomyl treatment; macrophage-downregulated protein; Spider biofilm induced
C1_03000W_A	HOL1	2.42	0.48	5.07	4e-07	7e-06	Putative MFS transporter; regulated by Nrg1; macrophage/pseudohyphal-repressed; induced by alpha pheromone in SpiderM medium; possibly an essential gene, disruptants not obtained by UAU1 method
C1_13160W_A	PSA2	2.42	0.33	7.27	3.52e-13	1.52e-11	Mannose-1-phosphate guanyltransferase; Hap43, macrophage-repressed; stationary phase enriched protein; Spider biofilm induced; rat catheter biofilm repressed
C6_02200C_A		2.41	0.57	4.22	2.5e-05	0.000292	Protein of unknown function; mRNA binds She3; transcript regulated upon yeast-hypha switch; induced in oralpharyngeal candidasis
CR_08790W_A	RDN58	2.41	0.16	14.97	1.24e-50	5.11e-48	5.8S ribosomal RNA; component of the large (60S) ribosomal subunit; encoded in about 55 copies of the rDNA repeat on Chromosome R
CR_08780W_A	ITS1	2.35	0.24	10	1.47e-23	1.17e-21	Non-coding region in the 55 copies of rDNA repeat, between RDN18 and RDN58; in S. cerevisiae it is transcribed as part of the 35S precursor that is processed during rRNA maturation to yield 18S, 5.8S, and 25S rRNA species
C4_05560C_A	ARO9	2.3	0.44	5.23	1.73e-07	3.18e-06	Aromatic transaminase; Ehrlich fusel oil pathway of aromatic alcohol biosynthesis; Rim101-dependent pH-regulation (alkaline induced); Hap43-induced gene
C3_00030C_A		2.29	0.23	10.17	2.65e-24	2.22e-22	Protein with a predicted DEAD-like DNA/RNA helicase domain; shows colony morphology-related gene regulation by Ssn6; overlaps orf19.5472; Spider biofilm repressed
C2_08055W_A	RPR1	2.26	0.5	4.52	6.19e-06	8.36e-05	Putative ortholog of S. cerevisiae RNAse P RNA; gene transcribed by RNA Pol III
CR_08810W_A	RDN25	2.25	0.16	14.19	1.1e-45	3.19e-43	25S ribosomal RNA; component of the large (60S) ribosomal subunit; encoded in about 55 copies of the rDNA repeat on Chromosome R; in some strains the gene may contain the self-splicing group I intron (LSU)
C4_05130C_A	ALD6	2.24	0.51	4.37	1.26e-05	0.00016	Putative aldehyde dehydrogenase; stationary phase enriched protein; expression regulated upon white-opaque switch; rat catheter biofilm induced; rat catheter and Spider biofilm induced
C6_03880W_A		2.23	0.41	5.43	5.49e-08	1.08e-06	Has domain(s) with predicted oxidoreductase activity and role in metabolic process
CR_05220C_A	GUT1	2.18	0.34	6.34	2.32e-10	7.05e-09	Putative glycerol kinase; downregulated upon adherence to polystyrene; greater mRNA abundance observed in a cyr1 homozygous null mutant than in wild type
C4_00390W_A		2.17	0.24	8.96	3.13e-19	2.04e-17	Ortholog(s) have chromatin binding activity
C1_04500W_A	ICL1	2.16	0.47	4.57	4.97e-06	6.91e-05	Isocitrate lyase; glyoxylate cycle enzyme; required for virulence in mice; induced upon phagocytosis by macrophage; farnesol regulated; Pex5-dependent peroxisomal localization; stationary phase enriched; rat catheter, Spider biofilm induced
C4_04520W_A		2.16	0.47	4.64	3.52e-06	5.01e-05	Ortholog(s) have enzyme activator activity, telomerase inhibitor activity, role in box C/D snoRNA 3'-end processing, negative regulation of telomere maintenance via telomerase and nucleolus, nucleoplasm localization
C2_02970C_A	ALD5	2.12	0.15	14.37	8.24e-47	2.65e-44	NAD-aldehyde dehydrogenase; decreased expression in fluconazole-resistant isolate, or in hyphae; biofilm induced; fluconazole-downregulated; protein abundance is affected by URA3 expression in the CAI-4 strain; stationary phase enriched
CR_00090C_A		2.11	0.42	5.06	4.29e-07	7.4e-06	Protein of unknown function; stationary phase enriched protein; induced upon yeast-hypha transition; benomyl or caspofungin induced; Hap43-repressed; Spider biofilm induced
C4_02040W_A		2.09	0.24	8.58	9.52e-18	5.86e-16	Ortholog(s) have polyamine oxidase activity and role in pantothenate biosynthetic process, spermine catabolic process
C4_03530W_A		2.07	0.37	5.63	1.78e-08	3.89e-07	Ortholog of Candida albicans WO-1 : CAWG_03455
CR_08920W_A		2.07	0.33	6.29	3.2e-10	9.52e-09	Protein with predicted oxidoreductase and dehydrogenase domains; Hap43-repressed; Spider biofilm induced
C1_08970W_A		2.06	0.24	8.67	4.46e-18	2.8e-16	C/D box small nucleolar RNA (snoRNA)
C2_00630C_A		2.06	0.42	4.86	1.19e-06	1.87e-05	Ortholog(s) have role in allantoin catabolic process
C7_02150C_A	ECM42	2.03	0.46	4.45	8.79e-06	0.000114	Ornithine acetyltransferase; Gcn2, Gcn4-regulated; clade-specific gene expression; possibly essential gene, disruptants not obtained by UAU1 method; Spider biofilm induced
TOP DOWNREGULATED GENES
ORF	Gene Name	log2FC	lfcSE	stat	pvalue	padj	Description
C4_01340W_A		-8.16	1.61	-5.06	4.2533e-07	7.3885e-06	Protein similar to GPI-linked cell-wall proteins; induced in low iron; Spider biofilm induced; regulated in Spider biofilms by Bcr1, Tec1, Ndt80, Brg1
C6_01360W_A		-7.17	1.11	-6.44	1.17707e-10	3.71775e-09	Protein of unknown function; ketoconazole-repressed
CR_04210C_A	QDR1	-7.11	0.6	-11.92	8.84987e-33	1.16255e-30	Putative antibiotic resistance transporter; regulated by white-opaque switch, Nrg1, Tup1; Hap43, caspofungin repressed; repressed during chlamydospore formation; flow model biofilm induced; Spider biofilm repressed
C2_08290C_A	UCF1	-6.09	0.85	-7.15	8.5825e-13	3.51821e-11	Upregulated by cAMP in filamentous growth; induced in high iron, decreased upon yeast-hypha switch; downregulation correlates with clinical fluconazole resistance; Ras1-regulated; Hap43-repressed; flow model biofilm induced
C4_04770C_A	MNN22	-5.9	0.38	-15.4	1.64799e-53	7.93783e-51	Alpha-1,2-mannosyltransferase; required for normal cell wall mannan; regulated by Tsa1, Tsa1B at 37 deg; repressed in core stress response; NO, Hog1 induced; confers sensitivity to cell wall perturbing agents; Spider biofilm repressed
CR_02920C_A	AQY1	-5.88	0.31	-19.26	1.16715e-82	2.2487e-79	Aquaporin water channel; osmotic shock resistance, WT freeze tolerance; virulent in mice; flucytosine repressed; flow model/RPMI/Spider/rat catheter biofilm induced; required for RPMI biofilm formation; Bcr1-induced in a/a RPMI biofilms
C2_08300C_A		-5.7	0.5	-11.32	1.00517e-29	1.11728e-27	Protein of unknown function; repressed by yeast-hypha switch; Ras1-regulated; oral infection induced; mutants defective in damage to oral epithelium; flow model biofilm induced; Spider biofilm induced
C1_14120C_A	RBE1	-5.36	0.59	-9.03	1.76185e-19	1.18412e-17	Pry family cell wall protein; Rim101, Efg1, Ssn6, alkaline repressed; O-glycosylation; no GPI anchor predicted; ketoconazol induced; regulated by Sef1, Sfu1, Hap4; flow model biofilm induced; rat catheter and Spider biofilm repressed
CR_10100C_A	INO1	-4.7	0.87	-5.42	5.81224e-08	1.1388e-06	Inositol-1-phosphate synthase; antigenic in human; repressed by farnesol in biofilm or by caspofungin; upstream inositol/choline regulatory element; glycosylation predicted; rat catheter, flow model induced; Spider biofilm repressed
C1_10360C_A		-4.66	0.36	-13	1.29533e-38	2.20206e-36	Putative protein of unknown function; Hap43p-repressed gene; increased transcription is observed upon fluphenazine treatment; possibly transcriptionally regulated by Tac1p; induced by nitric oxide; fungal-specific (no human/murine homolog
C1_08790W_A	TPO3	-4.51	0.18	-25.04	2.51151e-138	1.45165e-134	Putative polyamine transporter; MFS-MDR family; induced by Sfu1, regulated upon white-opaque; decreased expression in hyphae vs yeast-form cells; regulated by Nrg1; Spider biofilm repressed
C2_07630C_A		-4.38	0.6	-7.35	2.01485e-13	8.95832e-12	Possible stress protein; increased transcription associated with CDR1 and CDR2 overexpression or fluphenazine treatment; regulated by Sfu1, Nrg1, Tup1; stationary phase enriched protein; Spider biofilm induced
C5_02110W_A		-4.06	0.25	-15.98	1.6875e-57	1.08375e-54	Putative heat shock protein; decreased expression in hyphae; transcription is increased in populations of cells exposed to fluconazole over multiple generations; overexpression increases resistance to farnesol and azoles
C4_03430W_A	MOH1	-4.03	0.87	-4.65	3.38229e-06	4.86309e-05	Ortholog of S. cerevisiae Moh1, essential for staionary phase growth; induced by alpha pheromone in SpiderM medium and by Mnl1 under weak acid stress; possibly essential (UAU1 method); flow model biofilm induced; Spider biofilm induced
C1_06870C_A		-4.02	0.5	-8.11	5.14813e-16	2.86117e-14	Ortholog of C. parapsilosis CDC317 : CPAR2_208910, Candida tenuis NRRL Y-1498 : CANTEDRAFT_114047, Debaryomyces hansenii CBS767 : DEHA2D14388g and Pichia stipitis Pignal : PICST_37629
C5_02080C_A	HSP12	-4	0.25	-15.8	3.11914e-56	1.63897e-53	Heat-shock protein; induced by osmotic/oxidative/cadmium stress, fluphenazine treatment, low iron, CDR1 and CDR2 overexpression, or ssn6 or ssk1 null mutation; overexpression increases resistance to farnesol and azoles
C1_10400C_A	FGR41	-3.96	0.38	-10.48	1.12284e-25	9.68658e-24	Putative GPI-anchored adhesin-like protein; transposon mutation affects filamentous growth; Spider biofilm repressed
C2_05180W_A	WH11	-3.75	0.26	-14.54	7.05638e-48	2.71906e-45	White-phase yeast transcript; expression in opaques increases virulence/switching; mutant switches as WT; Hap43, hypoxia, ketoconazol induced; required for RPMI biofilm; Bcr1-induced in RPMI a/a biofilm; rat catheter, Spider biofilm induced
C2_04010C_A	HSP21	-3.67	0.72	-5.11	3.22169e-07	5.69461e-06	Small heat shock protein; role in stress response and virulence; fluconazole-downregulated; induced in cyr1 or ras1 mutant; stationary phase enriched protein; detected in some, not all, biofilm extracts; Spider biofilm induced
C1_10450W_A	GLY1	-3.62	0.22	-16.46	6.8879e-61	7.96241e-58	L-threonine aldolase; complements glycine auxotrophy of S. cerevisiae shm1 shm2 gly1-1 triple mutant; macrophage/pseudohyphal-induced; the GLY1 locus has an RFLP and is triploid in strain SGY269; flow model biofilm induced
C5_02630C_A	MNN1	-3.46	0.66	-5.23	1.7106e-07	3.15887e-06	Putative alpha-1,3-mannosyltransferase; of the mannosyltransferase complex; negatively regulated by Rim101; transcript elevated in chk1 and nik1 mutants, but not in sln1 mutant; Spider and flow model biofilm induced
C6_01510W_A	OYE23	-3.42	0.63	-5.44	5.30516e-08	1.05737e-06	Putative NAPDH dehydrogenase; induced by nitric oxide, benomyl; oxidative stress-induced via Cap1; Hap43p-repressed; rat catheter biofilm induced
CR_06860C_A	ARO10	-3.39	0.24	-14.11	3.2281e-45	8.88495e-43	Aromatic decarboxylase; Ehrlich fusel oil pathway of aromatic alcohol biosynthesis; alkaline repressed; protein abundance affected by URA3 expression in CAI-4 strain; Spider biofilm induced
C6_02010C_A	GPD2	-3.24	0.23	-14.39	6.1788e-47	2.10079e-44	Surface protein similar to glycerol 3-P dehydrogenase; binds host Factor H, FHL-1, plasminogen; regulated by Ssn6, Nrg1, Efg1; induced by cell wall regeneration, macrophage/pseudohyphal growth, core stress response; Spider biofilm induced
C2_07570W_A	RNR22	-3.23	0.24	-13.69	1.23669e-42	2.74926e-40	Putative ribonucleoside diphosphate reductase;colony morphology-related gene regulation by Ssn6; transcript regulated by tyrosol and cell density; Hap43-repressed; Spider biofilm induced
C1_11850W_A		-3.2	0.24	-13.39	7.02215e-41	1.44957e-38	Protein of unknown function; Hap43-repressed gene; mRNA binds to She3; repressed in hyphae; Efg1 and Efh1 regulated; 5'-UTR intron; induced by Mnl1 under weak acid stress; rat catheter biofilm induced
C1_13480W_A	HSP70	-3.19	0.24	-13.44	3.53288e-41	7.56299e-39	Putative hsp70 chaperone; role in entry into host cells; heat-shock, amphotericin B, cadmium, ketoconazole-induced; surface localized in yeast and hyphae; antigenic in host; farnesol-downregulated in biofilm; Spider biofilm induced
C5_03480C_A		-3.16	0.22	-14.29	2.51283e-46	7.64429e-44	Spermidine transporter; induced in strains from HIV patients with oral candidiasis; alkaline repressed; amphotericin B induced; colony morphology regulated by Ssn6; reduced oral epithelial cell damage by mutant; Spider biofilm induced
C1_02120C_A	SHA3	-3.11	0.24	-12.88	5.86559e-38	9.41753e-36	Putative ser/thr kinase involved in glucose transport; Tn mutation affects filamentous growth; fluconazole-induced; ketoconazole-repressed; induced in by alpha pheromone in SpiderM; possibly essential; flow model biofilm induced
C7_00350C_A		-3.08	0.26	-11.79	4.42436e-32	5.55931e-30	Protein of unknown function; induced in core stress response; induced by cadmium stress via Hog1; oxidative stress-induced via Cap1; induced by Mnl1 under weak acid stress; macrophage-repressed; rat catheter and Spider biofilm induced
C5_00390C_A		-3.07	0.29	-10.48	1.05942e-25	9.27793e-24	Protein of unknown function; transcript repressed upon yeast-hyphal switch; fluconazole-induced; Hap43-repressed; flow model biofilm induced
CR_01470W_A	CSP37	-3.06	0.22	-13.83	1.71542e-43	3.96606e-41	Hyphal cell wall protein; role in progression of mouse systemic infection; predicted P-loop, divalent cation binding, N-glycosylation sites; expressed in yeast and hyphae; hyphal downregulated; stationary-phase enriched; GlcNAc-induced
C1_12910W_A		-3.05	0.65	-4.65	3.26264e-06	4.70276e-05	Protein of unknown function; Spider biofilm repressed
C5_00890C_A	GIT2	-2.87	0.51	-5.63	1.79431e-08	3.89892e-07	Putative glycerophosphoinositol permease; fungal-specific; repressed by alpha pheromone in SpiderM medium; Hap43-repressed; Spider biofilm induced
C1_04770C_A	ERG3	-2.86	0.29	-9.96	2.23738e-23	1.74757e-21	C-5 sterol desaturase; introduces C-5(6) double bond into episterol; some clinical isolates show increased azole resistance and defects in hyphal growth and virulence; Efg1p-repressed; fluconazole-induced
C6_01670W_A	MAE1	-2.86	0.42	-6.81	9.8266e-12	3.53844e-10	Malic enzyme, mitochondrial; transcription regulated by Mig1, Tup1; colony morphology-related gene regulation by Ssn6; Hap43-repressed; Spider biofilm repressed
C2_07900W_A	GDH2	-2.82	0.15	-18.33	4.96618e-75	7.17613e-72	Putative NAD-specific glutamate dehydrogenase; fungal-specific; transcript regulated by Nrg1, Mig1, Tup1, and Gcn4; stationary phase enriched protein; flow model biofilm induced; Spider biofilm induced
C2_01020W_A	HGT6	-2.81	0.22	-12.5	7.02499e-36	1.06854e-33	Putative high-affinity MFS glucose transporter; 20 family members; induced in core stress response; fluconazole, oralpharyngeal candidasis induced; flow model biofilm induced; Spider biofilm induced
C4_05900C_A		-2.8	0.47	-5.91	3.38187e-09	8.28273e-08	Protein of unknown function; Rgt1, Hap43-repressed; flow model biofilm induced; Spider biofilm induced
C1_08460C_A	UPC2	-2.76	0.28	-9.83	8.56261e-23	6.42752e-21	Zn2-Cys6 transcript factor; regulator of ergosterol biosynthetic genes and sterol uptake; binds ERG2 promoter; induced by ergosterol depletion, by azoles, anaerobicity; macrophage/pseudohyphal-repressed; flow model biofilm induced
C7_01800C_A	PFK2	-2.76	0.14	-19.82	1.92313e-87	5.55786e-84	Phosphofructokinase beta subunit; fructose 2,6-bisphosphate, AMP activated; ATP inhibited; phagocytosis, hyphal repressed; fluconazole-induced; stationary-phase enriched; flow model biofilm induced; rat catheter/Spider biofilm repressed
C1_09080C_A	PGA6	-2.74	0.3	-8.99	2.43902e-19	1.6204e-17	GPI-anchored cell wall adhesin-like protein; induced by high iron; upregulated upon Als2 depletion; mRNA binds She3 and is localized to hyphal tips; Spider biofilm repressed
C4_01530C_A	ERG251	-2.71	0.25	-10.95	6.91316e-28	6.77255e-26	C-4 sterol methyl oxidase; role in ergosterol biosynthesis; Hap43-induced; ketoconazole-induced; amphotericin B, caspofungin repressed; possibly essential gene, disruptants not obtained by UAU1 method; Spider biofilm repressed
C2_02860W_A	SUR2	-2.64	0.22	-12.23	2.12304e-34	3.06779e-32	Putative ceramide hydroxylase; predicted enzyme of sphingolipid biosynthesis; regulated by Tsa1, Tsa1B under H2O2 stress conditions; Spider and flow model biofilm induced
C3_07280C_A		-2.61	0.32	-8.09	5.93698e-16	3.26817e-14	protein with ENTH Epsin domain, N-terminal; Spider biofilm repressed
C2_10240W_A	GPD1	-2.6	0.21	-12.13	7.54634e-34	1.03852e-31	Glycerol-3-phosphate dehydrogenase; glycerol biosynthesis; regulated by Efg1; regulated by Tsa1, Tsa1B under H2O2 stress conditions; Sflow model and Spider biofilm induced
C5_03510C_A		-2.6	0.35	-7.35	1.93794e-13	8.75101e-12	Protein of unknown function; mRNA binds to She3; Hap43-repressed; rat catheter and flow model biofilm induced
C4_01750C_A	FBA1	-2.59	0.17	-15.31	6.19086e-53	2.75255e-50	Fructose-bisphosphate aldolase; glycolytic enzyme; antigenic in murine/human infection; regulated by yeast-hypha switch; induced by Efg1, Gcn4, Hog1, fluconazole; phagocytosis-repressed; flow model biofilm induced; Spider biofilm repressed
C4_05730W_A		-2.58	0.38	-6.83	8.57656e-12	3.1375e-10	Adhesin-like protein; regulated by Tsa1, Tsa1B in minimal media at 37 deg; clade-associated gene expression; induced by alpha pheromone in SpiderM medium; Hap43-induced; Spider biofilm repressed
CR_07790C_A	YHB1	-2.55	0.2	-13	1.29399e-38	2.20206e-36	Nitric oxide dioxygenase; acts in nitric oxide scavenging/detoxification; role in virulence in mouse; transcript activated by NO, macrophage interaction; Hap43, hypha repressed; mRNA binds She3
C1_07220W_A		-2.54	0.56	-4.53	5.91028e-06	8.07599e-05	Protein of unknown function; Plc1p-regulated; expression induced early upon infection of reconstituted human epithelium (RHE), while expression of the C. dubliniensis ortholog is not; mutant is viable; Spider biofilm induced
C2_09950W_A	FCY21	-2.54	0.24	-10.55	5.2103e-26	4.63316e-24	High affinity, high capacity, hypoxanthine-adenine-guanine-cytosine/H+ symporter; similar to S. cerevisiae Fcy2; mutation confers resistance to 5-fluorocytosine (5-FC); flow model biofilm induced
C1_13140C_A	TYE7	-2.51	0.15	-16.32	7.2853e-60	6.01558e-57	bHLH transcription factor; control of glycolysis; required for biofilm formation; hyphally regulated by Cph1, Cyr1; flucytosine, Hog1 induced; amphotericin B, caspofungin repressed; induced in flow model biofilm and planktonic cultures
C3_04550C_A	CMK1	-2.5	0.23	-10.7	9.67531e-27	8.73802e-25	Putative calcium/calmodulin-dependent protein kinase II; expression regulated upon white-opaque switching; biochemically purified Ca2+/CaM-dependent kinase is soluble, cytosolic, monomeric, and serine-autophosphorylated; Hap43p-repressed
C6_01060C_A	CAN2	-2.49	0.23	-10.73	7.02739e-27	6.44735e-25	Basic amino acid permease; arginine metabolism; regulated by Nrg1/Tup1; caspofungin, flucytosine induced; colony morphology-related regulation by Ssn6; Hap43-repressed; rat catheter and Spider biofilm induced; promoter bound by Efg1
C1_05540C_A		-2.48	0.27	-9.06	1.2914e-19	8.78155e-18	Protein similar to GTPase regulators; induced in low iron; transcript activated by Mnl1 under weak acid stress; Hap43-, Sfu1- and Sef1-regulated; flow model biofilm induced, Spider biofilm induced
C2_07440C_A		-2.47	0.48	-5.15	2.58467e-07	4.6252e-06	Ortholog(s) have sterol esterase activity, role in sterol metabolic process and integral component of membrane, lipid droplet localization
C6_03990C_A		-2.47	0.58	-4.25	2.1614e-05	0.000259189	Predicted ORF overlapping the Major Repeat Sequence on chromosome 6; member of a family encoded by FGR6-related genes in the RB2 repeat sequence; rat catheter biofilm repressed
C6_00290W_A		-2.46	0.26	-9.54	1.37494e-21	9.8113e-20	Protein of unknown function; regulated by yeast-hypha switch; induced by Mnl1 in weak acid stress; 5' UTR intron; repressed by chlamydospore formation in C. albicans and C. dubliniensis; rat catheter, Spider and flow model biofilm induced
C6_00480C_A	FET31	-2.45	0.2	-12.19	3.67269e-34	5.1776e-32	Putative multicopper oxidase; ketoconazole/caspofungin/amphotericin B repressed; Sef1/Sfu1/Hap43 regulated; reports differ if functional homolog of ScFet3; rat catheter and Spider biofilm induced
C1_02600W_A	SNO1	-2.42	0.51	-4.74	2.15701e-06	3.22992e-05	Protein with a predicted role in pyridoxine metabolism; stationary phase protein; regulated by Tup1, Efg1; Spider biofilm induced
C3_01900C_A		-2.42	0.49	-4.95	7.37093e-07	1.20011e-05	Protein with a predicted FYVE/PHD zinc finger domain; Hap43-repressed; Spider biofilm induced
C5_04810W_A	PFK1	-2.38	0.15	-16.2	4.7654e-59	3.443e-56	Phosphofructokinase alpha subinit; activated by fructose 2,6-bisphosphate, AMP, ATP inhibited; activity reduced on hyphal induction; phagocytosis-repressed; fluconazole, flow model biofilm induced; rat catheter and Spider biofilm repressed
CR_05210W_A		-2.38	0.47	-5.06	4.26948e-07	7.3885e-06	Protein of unknown function; Hap43-repressed; Spider biofilm repressed
C7_02610C_A		-2.37	0.23	-10.37	3.35041e-25	2.84785e-23	Putative Gag protein of retrotransposon Tca2; separated by a stop codon from Pol protein orf19.2372; likely translated as single polyprotein that includes Gag, reverse transcriptase, protease, and integrase; rat catheter biofilm repressed
C2_09820W_A		-2.3	0.47	-4.89	1.01258e-06	1.63483e-05	Protein of unknown function; flow model biofilm induced; Spider biofilm induced
C7_01560C_A	NUP	-2.28	0.27	-8.53	1.50294e-17	8.95564e-16	Nucleoside permease; adenosine and guanosine are substrates, whereas cytidine, adenine, guanine, uridine, uracil are not; similar to a nucleoside permease of S. pombe; possibly processed by Kex2p
C3_01950C_A		-2.27	0.3	-7.54	4.85564e-14	2.37844e-12	Has domain(s) with predicted integral component of membrane localization
CR_09460C_A		-2.26	0.53	-4.26	2.09008e-05	0.000252733	Protein of unknown function; Spider biofilm induced
C6_03700W_A	ALS1	-2.25	0.25	-8.9	5.42945e-19	3.48691e-17	Cell-surface adhesin; adhesion, virulence, immunoprotective roles; band at hyphal base; Rfg1, Ssk1, Spider biofilm induced; flow model biofilm repressed; CAI-4 strain background effects; promoter bound Bcr1, Tec1, Efg1, Ndt80, and Brg1
C7_03200C_A		-2.25	0.41	-5.53	3.11985e-08	6.46335e-07	Putative pyridoxamine 5'-phosphate oxidase; planktonic growth and early-stage flow model biofilm induced
C3_01180C_A		-2.24	0.26	-8.53	1.45183e-17	8.74123e-16	Protein of unknown function; induced by Mnl1 under weak acid stress
C2_01380W_A	PLB4.5	-2.23	0.22	-10.13	3.9038e-24	3.17802e-22	Phospholipase B; Hog1-induced; regulated by Ssn6; putative GPI-anchor; repressed during cell wall regeneration; clade-associated gene expression; Hap43-induced; rat catheter and Spider biofilm repressed
C7_00730W_A	MET28	-2.23	0.39	-5.66	1.53095e-08	3.35186e-07	Predicted bZIP domain-containing transcription factor; protein induced during the mating process; possibly essential, disruptants not obtained by UAU1 method; Hap43-repressed; rat catheter biofilm induced
C1_09250W_A	CRP1	-2.21	0.17	-13.23	5.9827e-40	1.15267e-37	Copper transporter; CPx P1-type ATPase; mediates Cu resistance; similar to Menkes and Wilson disease proteins; copper-induced; Tbf1-activated; suppresses Cu sensitivity of S. cerevisiae cup1 mutant; flow model biofilm induced
CR_10110W_A	CHT3	-2.21	0.31	-7.03	2.08306e-12	8.08062e-11	Major chitinase; secreted; functional homolog of S. cerevisiae Cts1p; 4 N-glycosylation motifs; possible O-mannosylation; putative signal peptide; hyphal-repressed; farnesol upregulated in biofilm; regulated by Efg1p, Cyr1p, Ras1p
C2_02590W_A	ZRT2	-2.2	0.2	-10.88	1.47396e-27	1.39664e-25	Zinc transporter, essential for zinc uptake and acidic conditions tolerance; transcript induced by amphotericin B, interaction with macrophages; induced in oralpharyngeal candidiasis; Spider biofilm induced
C3_04580C_A	STP1	-2.2	0.23	-9.52	1.66928e-21	1.17664e-19	Transcription factor; regulates SAP2, OPT1 expression and thereby protein catabolism for nitrogen source; activated via amino-acid-induced proteolytic processing; macrophage/pseudohyphal-repressed; Spider biofilm repressed
C2_08590W_A	YWP1	-2.19	0.19	-11.58	5.23496e-31	6.17511e-29	Secreted yeast wall protein; possible role in dispersal in host; mutation increases adhesion and biofilm formation; propeptide; growth phase, phosphate, Ssk1/Ssn6/Efg1/Efh1/Hap43 regulated; mRNA binds She3; flow and Spider biofilm repressed
C6_00330C_A	GNP1	-2.19	0.15	-14.39	6.13973e-47	2.10079e-44	Similar to asparagine and glutamine permease; fluconazole, caspofungin induced; regulated by Nrg1, Mig1, Tup1, Gcn2, Gcn4, and alkaline regulated by Rim101; repressed during chlamydospore formation; rat catheter, flow model biofilm induced
C2_08490W_A	DSE1	-2.18	0.33	-6.61	3.86254e-11	1.29049e-09	Essential cell wall protein involved in cell wall integrity and rigidity; periodic mRNA expression peaks at M/G1 phase; Ace2p-induced; required for virulence in a mouse model of infection
C4_01360W_A	PGA53	-2.18	0.22	-9.78	1.43601e-22	1.06412e-20	GPI-anchored cell surface protein of unknown function; greater mRNA abundance observed in a cyr1 homozygous null mutant than in wild type
C7_00930W_A	GPH1	-2.17	0.2	-10.76	5.56401e-27	5.18709e-25	Putative glycogen phosphorylase; role in glycogen metabolism; regulated by Ssk1, Mig1, Tup1, Hap43; fluconazole-induced; localizes to cell surface of hyphae, not yeast; stationary phase enriched protein; Spider biofilm induced
C3_06860C_A		-2.15	0.38	-5.61	1.97807e-08	4.23454e-07	Putative xylose and arabinose reductase; flow model biofilm induced; Spider biofilm repressed
CR_09140C_A		-2.15	0.51	-4.24	2.21853e-05	0.00026494	Protein with a role in directing meiotic recombination events to homologous chromatids; induced by ciclopirox olamine; positively regulated by Sfu1; Hog1, fluconazole-repressed; Hap43-induced; Spider biofilm induced
C3_00800W_A	MIH1	-2.14	0.29	-7.39	1.48429e-13	6.86335e-12	Putative protein phosphatase of the PTP family (tyrosine-specific); ortholog of S. cerevisiae Mih1; mRNA binds She3
C1_08590C_A	ERG1	-2.1	0.19	-11.26	1.96966e-29	2.10826e-27	Squalene epoxidase, epoxidation of squalene to 2,3(S)-oxidosqualene; ergosterol biosynthesis; allylamine antifungal drug target; NADH reducing cofactor but S. cerevisiae Erg1 uses NADPH; flow model biofilm induced; Spider biofilm repressed
C4_06570C_A	PDC11	-2.1	0.39	-5.36	8.4928e-08	1.63628e-06	Pyruvate decarboxylase; antigenic; on hyphal not yeast cell surface; Hap43, Gcn4, Efg1, Efh1, Hsf1 regulated; fluconazole, farnesol induced; amino acid starvation repressed; flow model biofilm induced; Spider biofilm repressed
C2_06020W_A	CNT	-2.09	0.22	-9.61	7.33417e-22	5.29894e-20	CNT family H(+)/nucleoside symporter; transports adenosine, uridine, inosine, guanosine, tubercidin; variant alleles for high/low-affinity isoforms; S or G at residue 328 affects specificity; Spider, flow model biofilm induced
C3_02480C_A	CCP1	-2.06	0.18	-11.63	2.95885e-31	3.56295e-29	Cytochrome-c peroxidase N terminus; Rim101, alkaline pH repressed; induced in low iron or by macrophage interaction; oxygen-induced activity; regulated by Sef1, Sfu1, and Hap43; Spider biofilm induced; rat catheter biofilm repressed
C3_03420C_A	NDE1	-2.06	0.15	-14.01	1.29443e-44	3.40083e-42	Putative NADH dehydrogenase; may act alternatively to complex I in respiration; caspofungin repressed; rat catheter biofilm induced; Spider biofilm repressed
C5_04110W_A	SCW11	-2.03	0.25	-8.23	1.85853e-16	1.06359e-14	Cell wall protein; repressed in ace2 mutant; repressed in core caspofungin response; induced in high iron; possibly an essential gene, disruptants not obtained by UAU1 method; rat catheter and Spider biofilm repressed
C1_06850W_A	PCL7	-2.02	0.28	-7.14	9.42199e-13	3.83515e-11	Putative cyclin-like protein; possible Pho85 cyclin; hyphal repressed; induced by Mnl1 under weak acid stress
C1_08610C_A		-2	0.25	-7.97	1.60967e-15	8.5357e-14	Ortholog of S. cerevisiae Aim38/Rcf2, cytochrome c oxidase subunit; plasma membrane localized; Hap43-repressed; induced in oralpharyngeal candidasis; flow model biofilm induced; Spider biofilm repressed
C1_11080W_A		-2	0.3	-6.62	3.68055e-11	1.23684e-09	Putative 6-phosphofructo-2-kinase; catalyzes synthesis of fructose-2,6-bisphosphate; Hap43-repressed; flow model, rat catheter and Spider biofilm induced
C2_06860W_A	LTE1	-2	0.33	-6.01	1.91186e-09	4.91556e-08	Protein similar to GDP/GTP exchange factors; repressed by alpha pheromone in SpiderM medium; flow model biofilm repressed
C2_10430C_A	FGR29	-2	0.46	-4.33	1.51426e-05	0.000189447	Protein lacking an ortholog in S. cerevisiae; transposon mutation affects filamentous growth; rat catheter biofilm repressed

## Sheet: spt8 mutant
Table S5. RNA Seq analysis of spt8 mutant
TOP UPREGULATED GENES
ORF	Gene Names	log2FC	lfcSE	stat	pvalue	padj	Description
C4_03570W_A	HWP1	12.71	2.08	6.1	1.05224e-09	5.66501e-08	Hyphal cell wall protein; host transglutaminase substrate; opaque-, a-specific, alpha-factor induced; at MTLa side of conjugation tube; virulence complicated by URA3 effects; Bcr1-repressed in RPMI a/a biofilms; Spider biofilm induced
C7_00120W_A		9.34	1.52	6.13	8.87847e-10	4.86768e-08	Putative mitochondrial outer membrane protein membrane fission effector; possibly an essential gene, disruptants not obtained by UAU1 method
C3_04160W_A	DAL8	8.33	1.61	5.17	2.39649e-07	9.29961e-06	Putative allantoate permease; fungal-specific (no human or murine homolog)
C2_07790C_A		7.41	1.72	4.31	1.6526e-05	0.000408095	Protein of unknown function; induced by alpha pheromone in SpiderM medium
C2_00660C_A	SOD4	7.02	1.8	3.91	9.39273e-05	0.00181654	Cu-containing superoxide dismutase; role in response to host innate immune ROS; regulated on white-opaque switch; ciclopirox olamine induced; caspofungin repressed; SOD1,4,5,6 gene family; yeast-associated; Spider biofilm induced
C3_06450W_A	GLG2	6.76	1.88	3.6	0.000322994	0.00515646	Putative self-glucosylating initiator of glycogen synthesis; expression regulated upon white-opaque switch; hypha-induced; Spider biofilm induced
C1_05920W_A		6.62	1.9	3.48	0.000497238	0.00722991	Protein of unknown function; induced during chlamydospore formation in both C. albicans and C. dubliniensis; Spider biofilm induced
C6_02890C_A	HPD1	6.58	1.91	3.44	0.000574708	0.00802828	3-hydroxypropionate dehydrogenase; involved in degradation of toxic propionyl-CoA; rat catheter and Spider biofilm induced
C2_05600W_A		6.49	1.93	3.36	0.00079231	0.0104661	C/D box small nucleolar RNA (snoRNA)
CR_00620C_A	ARG1	5.61	0.46	12.17	4.41957e-34	2.40103e-31	Argininosuccinate synthase; arginine synthesis; Gcn4, Rim101 regulated; induced by amino acid starvation (3-AT), benomyl treatment; stationary phase enriched protein; repressed in alkalinizing medium; rat catheter, Spider biofilm induced
C7_00110W_A	SOD3	4.88	0.5	9.85	7.10012e-23	1.46311e-20	Cytosolic manganese-containing superoxide dismutase; protects against oxidative stress; repressed by ciclopirox olamine, induced during stationary phase when SOD1 expression is low; Hap43-repressed; Spider and flow model biofilm induced
C7_00280W_A	HGT12	4.6	1.11	4.14	3.43591e-05	0.000754889	Glucose, fructose, mannose transporter; major facilitator superfamily; role in macrophage-induced hyphal growth; detected at germ tube plasma membrane by mass spectrometry; Snf3p-induced; 12 probable transmembrane segments
C7_03150W_A		4.55	1.24	3.65	0.000257743	0.00426669	Protein of unknown function; rat catheter and Spider biofilm induced
C1_00780C_A	HGC1	4.54	1.31	3.47	0.000527987	0.00758473	Hypha-specific G1 cyclin-related protein involved in regulation of morphogenesis, biofilm formation; Cdc28-Hgc1 maintains Cdc11 S394 phosphorylation during hyphal growth; required for virulence in mice; regulated by Nrg1, Tup1, farnesol
C2_09890W_A	SMM1	4.23	1.18	3.59	0.000329911	0.00522957	Putative dihydrouridine synthase; Hap43-induced gene; rat catheter biofilm induced; Spider biofilm induced
C2_02080W_A		3.47	0.74	4.7	2.65707e-06	8.14291e-05	C/D box small nucleolar RNA (snoRNA)
C1_02630C_A	EXG2	3.45	0.27	12.82	1.26097e-37	9.41942e-35	GPI-anchored cell wall protein, similar to S. cerevisiae exo-1,3-beta-glucosidase Exg2p; predicted Kex2p substrate; induced during cell wall regeneration; possibly an essential gene, disruptants not obtained by UAU1 method; Hap43p-repressed
C4_00130W_A	RBT5	3.44	0.61	5.66	1.47323e-08	6.82481e-07	GPI-linked cell wall protein; hemoglobin utilization; Rfg1, Rim101, Tbf1, Fe regulated; Sfu1, Hog1, Tup1, serum, alkaline pH, antifungal drugs, geldamycin repressed; Hap43 induced; required for RPMI biofilms; Spider biofilm induced
C5_01160C_A		3.43	0.74	4.65	3.35956e-06	0.000100888	C/D box small nucleolar RNA (snoRNA)
C2_06590C_A	GIT1	3.37	0.6	5.64	1.73011e-08	7.89248e-07	Glycerophosphoinositol permease; involved in utilization of glycerophosphoinositol as a phosphate source; Rim101-repressed; virulence-group-correlated expression
C1_13160W_A	PSA2	3.35	0.27	12.26	1.4695e-34	8.78175e-32	Mannose-1-phosphate guanyltransferase; Hap43, macrophage-repressed; stationary phase enriched protein; Spider biofilm induced; rat catheter biofilm repressed
C2_00680C_A	SOD5	3.23	0.48	6.74	1.57136e-11	1.0671e-09	Cu-containing superoxide dismutase; protects against oxidative stress; induced by neutrophils, hyphal growth, caspofungin, osmotic/oxidative stress; oralpharyngeal candidiasis induced; rat catheter and Spider biofilm induced
C7_02280W_A		3.17	0.7	4.51	6.52977e-06	0.000177372	Ortholog of C. parapsilosis CDC317 : CPAR2_808370, C. dubliniensis CD36 : Cd36_72070, Candida orthopsilosis Co 90-125 : CORT_0C00800 and Candida albicans WO-1 : CAWG_05577
C5_02220C_A		3.11	0.95	3.29	0.00100989	0.0128133	Putative polyphosphate phosphatase; role in hydrolysis of diphosphorylated inositol polyphosphates and diadenosine polyphosphates; Spider biofilm induced
CR_08670C_A		3.05	0.66	4.61	4.03349e-06	0.000118158	Protein with an enoyl-CoA hydratase related domain; Spider biofilm induced
CR_06210C_A		2.96	0.81	3.64	0.000268852	0.00442606	C/D box small nucleolar RNA (snoRNA)
CR_06500C_A		2.95	0.52	5.69	1.28172e-08	6.079e-07	Protein of unknown function; Hap43-induced; regulated by Nrg1, Tup1; repressed by alpha pheromone in SpiderM medium; Spider biofilm induced; Bcr1-repressed in RPMI a/a biofilms
C2_10800W_A		2.89	0.49	5.95	2.7129e-09	1.39761e-07	C/D box small nucleolar RNA (snoRNA)
CR_07070C_A	ALS3	2.86	0.75	3.79	0.000153474	0.00272154	Cell wall adhesin; epithelial adhesion, endothelial invasion; alleles vary in adhesiveness; immunoprotective in mice; binds SspB adhesin of S. gordonii in mixed biofilm; induced in/required for Spider biofilm; flow model biofilm repressed
C1_12990W_A		2.81	0.57	4.94	7.86819e-07	2.68292e-05	C/D box small nucleolar RNA (snoRNA)
CR_06220C_A		2.8	0.73	3.84	0.000121789	0.00226732	C/D box small nucleolar RNA (snoRNA)
CR_09680C_A	RTA4	2.8	0.81	3.47	0.000520012	0.00750607	Protein similar to S. cerevisiae Rsb1p, involved in fatty acid transport; transposon mutation affects filamentous growth; alkaline downregulated; caspofungin induced; possibly an essential gene; Hap43p-repressed
CR_10640W_A		2.72	0.5	5.45	5.03935e-08	2.15108e-06	Has domain(s) with predicted antiporter activity, role in drug transmembrane transport and membrane localization
CR_04275W_A	SCR1	2.69	0.44	6.07	1.30284e-09	6.82965e-08	Putative ortholog of S. cerevisiae signal recognition particle (SRP) RNA; gene transcribed by RNA Pol III
CR_08510W_A	PGA13	2.66	0.38	7.07	1.59395e-12	1.17598e-10	GPI-anchored cell wall protein involved in cell wall synthesis; required for normal cell surface properties; induced in oralpharyngeal candidasis; Spider biofilm induced; Bcr1-repressed in RPMI a/a biofilms
C1_06280C_A	UME6	2.53	0.71	3.55	0.00038534	0.00593361	Zn(II)2Cys6 transcription factor; has a long 5'-UTR that regulates translational efficiency and controls transition to filamentous growth; stability controlled by Grr1p, Ubr1p, Ptc2p in response to CO2 and O2 levels
C1_13000W_A		2.53	0.7	3.6	0.000312575	0.0050349	C/D box small nucleolar RNA (snoRNA)
C6_00440C_A	FET34	2.51	0.24	10.26	1.04427e-24	2.71328e-22	Multicopper ferroxidase; induced by low iron, ciclopirox olamine, ketoconazole, hypoxia; alkaline induced by Rim101; repressed in fluconazole-resistant isolate; Sfu1, Hog1 repressed; complements S. cerevisiae fet3; Spider biofilm induced
C7_03880C_A		2.47	0.67	3.67	0.00023904	0.00400141	Protein required for virulence in reconstituted human epithelium (RHE) model of ex vivo infection; decreased transcription is observed upon fluphenazine treatment; induced upon adherence to polystyrene
C1_02270C_A		2.37	0.61	3.92	8.88765e-05	0.00173571	Putative oxidoreductase; Spider biofilm induced
C4_06780C_A	OYE32	2.37	0.42	5.6	2.11863e-08	9.59161e-07	NAD(P)H oxidoreductase family protein; induced by nitric oxide, amphotericin B, oxidative stress via Cap1; upregulation associated with MDR1 overexpression or benomyl treatment; macrophage-downregulated protein; Spider biofilm induced
CR_10460W_A		2.34	0.51	4.56	5.08901e-06	0.000143453	C/D box small nucleolar RNA (snoRNA)
CR_08810W_A	RDN25	2.27	0.2	11.23	2.81002e-29	9.87804e-27	25S ribosomal RNA; component of the large (60S) ribosomal subunit; encoded in about 55 copies of the rDNA repeat on Chromosome R; in some strains the gene may contain the self-splicing group I intron (LSU)
C1_09290C_A	ARG5,6	2.23	0.27	8.19	2.69093e-16	3.0925e-14	Arginine biosynthetic enzyme; processed in S. cerevisiae into 2 polypeptides with acetylglutamate kinase (Arg6) activity and acetylglutamate-phosphate reductase (Arg5) activity; Gcn4 regulated; alkaline repressed; Spider biofilm induced
C1_08970W_A		2.19	0.25	8.8	1.34422e-18	2.11396e-16	C/D box small nucleolar RNA (snoRNA)
C1_08810C_A	MSS116	2.18	0.28	7.85	4.08621e-15	3.8155e-13	Putative DEAD-box protein; required for efficient splicing of mitochondrial Group I and II introns; Hap43-induced; rat catheter biofilm induced
C2_08055W_A	RPR1	2.17	0.53	4.11	3.91319e-05	0.000835186	Putative ortholog of S. cerevisiae RNAse P RNA; gene transcribed by RNA Pol III
CR_09880W_A	DEF1	2.12	0.18	12.12	7.83914e-34	3.90389e-31	RNA polymerase II regulator; role in filamentation, epithelial cell escape, dissemination in RHE model; induced by fluconazole, high cell density; Efg1/hyphal regulated; role in adhesion, hyphal growth on solid media; Spider biofilm induced
CR_05370W_A		2.11	0.42	4.98	6.41641e-07	2.26334e-05	Telomerase RNA; provides the template for the telomerase reverse transcriptase TERT/EST2
CR_08790W_A	RDN58	2.1	0.21	10.2	2.08544e-24	4.79331e-22	5.8S ribosomal RNA; component of the large (60S) ribosomal subunit; encoded in about 55 copies of the rDNA repeat on Chromosome R
C2_00630C_A		2.06	0.44	4.67	3.07416e-06	9.32549e-05	Ortholog(s) have role in allantoin catabolic process
CR_08800W_A	ITS2	2.05	0.25	8.26	1.46371e-16	1.77932e-14	Non-coding region in the 55 copies of rDNA repeat, between RDN58 and RDN25; in S. cerevisiae it is transcribed as part of the 35S precursor that is processed during rRNA maturation to yield 18S, 5.8S, and 25S rRNA species
TOP DOWNREGULATED GENES
OFR	Gene Names	log2FC	lfcSE	stat	pvalue	padj	Description
C4_01340W_A		-8.2	1.61	-5.08	3.70595e-07	1.3587e-05	Protein similar to GPI-linked cell-wall proteins; induced in low iron; Spider biofilm induced; regulated in Spider biofilms by Bcr1, Tec1, Ndt80, Brg1
C4_04770C_A	MNN22	-6.07	0.4	-15.07	2.45871e-51	4.89775e-48	Alpha-1,2-mannosyltransferase; required for normal cell wall mannan; regulated by Tsa1, Tsa1B at 37 deg; repressed in core stress response; NO, Hog1 induced; confers sensitivity to cell wall perturbing agents; Spider biofilm repressed
C1_06870C_A		-5.33	0.64	-8.31	9.37572e-17	1.19211e-14	Ortholog of C. parapsilosis CDC317 : CPAR2_208910, Candida tenuis NRRL Y-1498 : CANTEDRAFT_114047, Debaryomyces hansenii CBS767 : DEHA2D14388g and Pichia stipitis Pignal : PICST_37629
C2_04010C_A	HSP21	-5.04	0.9	-5.58	2.41688e-08	1.07785e-06	Small heat shock protein; role in stress response and virulence; fluconazole-downregulated; induced in cyr1 or ras1 mutant; stationary phase enriched protein; detected in some, not all, biofilm extracts; Spider biofilm induced
C2_08300C_A		-4.79	0.43	-11.25	2.19132e-29	8.18457e-27	Protein of unknown function; repressed by yeast-hypha switch; Ras1-regulated; oral infection induced; mutants defective in damage to oral epithelium; flow model biofilm induced; Spider biofilm induced
C2_08290C_A	UCF1	-4.36	0.2	-22.05	1.02933e-107	6.15126e-104	Upregulated by cAMP in filamentous growth; induced in high iron, decreased upon yeast-hypha switch; downregulation correlates with clinical fluconazole resistance; Ras1-regulated; Hap43-repressed; flow model biofilm induced
C6_01990W_A	PLB1	-4.31	0.66	-6.5	7.87483e-11	4.80204e-09	Phospholipase B; host cell penetration and virulence in mouse systemic infection; Hog1-induced; signal sequence, N-glycosylation, and Tyr phosphorylation site; induced in fluconazole-resistant strains; rat catheter biofilm repressed
CR_02920C_A	AQY1	-4.1	1.17	-3.51	0.000452429	0.00672559	Arginase; arginine catabolism; transcript regulated by Nrg1, Mig1, Tup1; colony morphology-related regulation by Ssn6; alkaline induced; protein decreased in stationary phase; sumoylation target; flow model biofilm induced
C6_01060C_A	CAN2	-4.03	0.33	-12.03	2.56201e-33	1.17774e-30	Basic amino acid permease; arginine metabolism; regulated by Nrg1/Tup1; caspofungin, flucytosine induced; colony morphology-related regulation by Ssn6; Hap43-repressed; rat catheter and Spider biofilm induced; promoter bound by Efg1
C4_05730W_A		-3.7	0.43	-8.64	5.81835e-18	8.08616e-16	Adhesin-like protein; regulated by Tsa1, Tsa1B in minimal media at 37 deg; clade-associated gene expression; induced by alpha pheromone in SpiderM medium; Hap43-induced; Spider biofilm repressed
C1_07220W_A		-3.51	0.62	-5.67	1.43129e-08	6.68234e-07	Protein of unknown function; Plc1p-regulated; expression induced early upon infection of reconstituted human epithelium (RHE), while expression of the C. dubliniensis ortholog is not; mutant is viable; Spider biofilm induced
C1_08790W_A	TPO3	-3.4	0.88	-3.88	0.000103744	0.00198075	Putative polyamine transporter; MFS-MDR family; induced by Sfu1, regulated upon white-opaque; decreased expression in hyphae vs yeast-form cells; regulated by Nrg1; Spider biofilm repressed
C1_10400C_A	FGR41	-3.36	0.33	-10.14	3.56372e-24	7.88771e-22	Putative GPI-anchored adhesin-like protein; transposon mutation affects filamentous growth; Spider biofilm repressed
C3_03440C_A		-3.36	0.74	-4.54	5.52922e-06	0.00015513	Putative spermidine export pump; fungal-specific (no human or murine homolog)
C4_02740W_A		-3.29	0.6	-5.51	3.61013e-08	1.58634e-06	Protein of unknown function; flow model, rat catheter and Spider biofilm induced; Hap43-repressed
CR_06860C_A	ARO10	-3.15	0.24	-12.92	3.38945e-38	2.89363e-35	Aromatic decarboxylase; Ehrlich fusel oil pathway of aromatic alcohol biosynthesis; alkaline repressed; protein abundance affected by URA3 expression in CAI-4 strain; Spider biofilm induced
C2_01270W_A	CHA1	-3.1	0.24	-12.94	2.79514e-38	2.89363e-35	Similar to catabolic ser/thr dehydratases; repressed by Rim101; induced in low iron; regulated on white-opaque switch; filament induced; Tn mutation affects filamentation; flow model biofilm induced; Spider biofilm repressed
C1_11850W_A		-3.06	0.28	-10.94	7.22753e-28	2.27325e-25	Protein of unknown function; Hap43-repressed gene; mRNA binds to She3; repressed in hyphae; Efg1 and Efh1 regulated; 5'-UTR intron; induced by Mnl1 under weak acid stress; rat catheter biofilm induced
C7_01560C_A	NUP	-3.01	0.34	-8.96	3.15819e-19	5.10091e-17	Nucleoside permease; adenosine and guanosine are substrates, whereas cytidine, adenine, guanine, uridine, uracil are not; similar to a nucleoside permease of S. pombe; possibly processed by Kex2p
C4_00440C_A	OPT7	-2.99	0.47	-6.29	3.12061e-10	1.79315e-08	Putative oligopeptide transporter; possibly transports GSH or related compounds; Hog1-induced; expression of OPT6, -7, or -8 does not suppress defect of mutant lacking OPT1-3; Hap43-repressed; F-12/CO2 early biofilm induced
C6_01360W_A		-2.94	0.48	-6.11	9.83074e-10	5.34077e-08	Protein of unknown function; ketoconazole-repressed
C1_14120C_A	RBE1	-2.92	0.41	-7.09	1.32218e-12	9.87671e-11	Pry family cell wall protein; Rim101, Efg1, Ssn6, alkaline repressed; O-glycosylation; no GPI anchor predicted; ketoconazol induced; regulated by Sef1, Sfu1, Hap4; flow model biofilm induced; rat catheter and Spider biofilm repressed
C1_13870W_A	MET3	-2.82	0.26	-10.95	6.75123e-28	2.24141e-25	ATP sulfurlyase; sulfate assimilation; repressed by Met, Cys, Sfu1, or in fluconazole-resistant isolate; Hog1, caspofungin, white phase-induced; induced on biofilm formation, even in presence of Met and Cys; Spider, F-12/CO2 biofilm induced
C2_07900W_A	GDH2	-2.78	0.18	-15.12	1.17279e-51	3.50429e-48	Putative NAD-specific glutamate dehydrogenase; fungal-specific; transcript regulated by Nrg1, Mig1, Tup1, and Gcn4; stationary phase enriched protein; flow model biofilm induced; Spider biofilm induced
C5_00390C_A		-2.63	0.3	-8.79	1.50064e-18	2.29945e-16	Protein of unknown function; transcript repressed upon yeast-hyphal switch; fluconazole-induced; Hap43-repressed; flow model biofilm induced
C4_03960W_A		-2.61	0.33	-7.95	1.81895e-15	1.87415e-13	Protein of unknown function; ORF added to Assembly 21 based on comparative genome analysis; protein detected by mass spec in stationary phase cultures
C1_10360C_A		-2.6	0.28	-9.17	4.66744e-20	7.96933e-18	Putative protein of unknown function; Hap43p-repressed gene; increased transcription is observed upon fluphenazine treatment; possibly transcriptionally regulated by Tac1p; induced by nitric oxide; fungal-specific (no human/murine homolog
C3_03490W_A	RSN1	-2.55	0.76	-3.36	0.000789814	0.0104655	Protein of unknown function; flow model biofilm induced; Spider biofilm induced; induced during the mating process; Hap43-repressed
C3_04580C_A	STP1	-2.54	0.25	-10.21	1.84657e-24	4.41403e-22	Transcription factor; regulates SAP2, OPT1 expression and thereby protein catabolism for nitrogen source; activated via amino-acid-induced proteolytic processing; macrophage/pseudohyphal-repressed; Spider biofilm repressed
C2_08590W_A	YWP1	-2.45	0.18	-13.93	4.08078e-44	6.09668e-41	Secreted yeast wall protein; possible role in dispersal in host; mutation increases adhesion and biofilm formation; propeptide; growth phase, phosphate, Ssk1/Ssn6/Efg1/Efh1/Hap43 regulated; mRNA binds She3; flow and Spider biofilm repressed
CR_02060W_A		-2.41	0.67	-3.58	0.000340297	0.00536574	Protein of unknown function; Spider biofilm induced
C1_05160C_A		-2.35	0.27	-8.57	1.04432e-17	1.38685e-15	Putative phosphatidyl synthase; stationary phase enriched protein; transcript repressed by yeast-hypha switch; Hap43-repressed; rat catheter, Spider and flow model biofilm induced
C6_01510W_A	OYE23	-2.35	0.53	-4.41	1.05571e-05	0.000273112	Putative NAPDH dehydrogenase; induced by nitric oxide, benomyl; oxidative stress-induced via Cap1; Hap43p-repressed; rat catheter biofilm induced
C3_03640W_A	DAL9	-2.32	0.39	-5.93	3.12057e-09	1.59389e-07	Putative allantoate permease; fungal-specific (no human or murine homolog)
C5_00880C_A	GIT3	-2.29	0.31	-7.41	1.29691e-13	1.07644e-11	Glycerophosphocholine permease; white cell specific transcript; fungal-specific; alkaline repressed; caspofungin, macrophage/pseudohyphal-repressed; flow model biofilm induced; Spider biofilm induced
C1_09080C_A	PGA6	-2.28	0.31	-7.25	4.01835e-13	3.28954e-11	GPI-anchored cell wall adhesin-like protein; induced by high iron; upregulated upon Als2 depletion; mRNA binds She3 and is localized to hyphal tips; Spider biofilm repressed
C2_05640W_A		-2.26	0.28	-8.02	1.07286e-15	1.1873e-13	Putative helix-loop-helix (HLH) transcription factor with a role in filamentous growth
C3_01900C_A		-2.26	0.41	-5.46	4.83367e-08	2.07813e-06	Protein with a predicted FYVE/PHD zinc finger domain; Hap43-repressed; Spider biofilm induced
C1_12910W_A		-2.22	0.65	-3.42	0.000627488	0.00864025	Protein of unknown function; Spider biofilm repressed
C5_04490C_A	CAR1	-2.17	0.2	-10.91	9.83556e-28	2.93886e-25	Arginase; arginine catabolism; transcript regulated by Nrg1, Mig1, Tup1; colony morphology-related regulation by Ssn6; alkaline induced; protein decreased in stationary phase; sumoylation target; flow model biofilm induced
C5_05190W_A	PCL5	-2.17	0.67	-3.24	0.00119007	0.0147243	Putative cyclin for Pho85 kinase; Gcn4-induced; suppresses toxicity of C. albicans Gcn4 overproduction in S. cerevisiae via increased Pho85-dependent phosphorylation and degradation of Gcn4; rat catheter and Spider biofilm induced
C2_02860W_A	SUR2	-2.16	0.21	-10.49	9.22728e-26	2.62582e-23	Putative ceramide hydroxylase; predicted enzyme of sphingolipid biosynthesis; regulated by Tsa1, Tsa1B under H2O2 stress conditions; Spider and flow model biofilm induced
C2_02590W_A	ZRT2	-2.15	0.21	-10.02	1.22666e-23	2.61804e-21	Zinc transporter, essential for zinc uptake and acidic conditions tolerance; transcript induced by amphotericin B, interaction with macrophages; induced in oralpharyngeal candidiasis; Spider biofilm induced
C5_02600W_A	PUT1	-2.15	0.31	-6.95	3.68588e-12	2.59139e-10	Putative proline oxidase; alkaline upregulated by Rim101; flow model biofilm induced; Spider biofilm induced
C7_02810W_A	PRX1	-2.08	0.23	-9.09	9.78517e-20	1.62434e-17	Thioredoxin peroxidase; transcriptionally induced by interaction with macrophage; fluconazole induced; Fkh2p-downregulated; caspofungin repressed; protein present in exponential and stationary growth phase yeast cultures
CR_06300C_A	FGR50	-2.05	0.6	-3.43	0.000611214	0.0084356	Protein lacking an ortholog in S. cerevisiae; transposon mutation affects filamentous growth; Spider biofilm repressed
CR_02240C_A	OPT2	-2.03	0.42	-4.82	1.44282e-06	4.63564e-05	Oligopeptide transporter; induced upon phagocytosis by macrophage; macrophage/pseudohyphal-repressed after 16h; fluconazole-induced; virulence-group-correlated expression; Hap43-repressed
C1_02530C_A	DIP5	-2.02	0.2	-10.26	1.11331e-24	2.77213e-22	Dicarboxylic amino acid permease; mutation confers hypersensitivity to toxic ergosterol analog; induced upon phagocytosis by macrophage; Gcn4-regulated; upregulated by Rim101 at pH 8; rat catheter and Spider biofilm induced
C4_04000W_A	MET4	-2.01	0.53	-3.79	0.000150181	0.00267109	Putative transcription coactivator; predicted role in sulfur amino acid metabolism; required for yeast cell adherence to silicone substrate; Spider biofilm induced
C4_05880W_A	GAT1	-1.99	0.31	-6.33	2.44024e-10	1.41582e-08	GATA-type transcription factor; regulator of nitrogen utilization; required for nitrogen catabolite repression and utilization of isoleucine, tyrosine and tryptophan N sources; required for virulence in a mouse systemic infection model
C1_07350C_A	GPX3	-1.98	0.57	-3.47	0.000511091	0.00739534	Putative glutathione peroxidase involved in Cap1p-dependent oxidative stress response, required for Cap1p oxidation in response to H2O2; planktonic growth-induced
C6_00330C_A	GNP1	-1.98	0.15	-12.92	3.3849e-38	2.89363e-35	Similar to asparagine and glutamine permease; fluconazole, caspofungin induced; regulated by Nrg1, Mig1, Tup1, Gcn2, Gcn4, and alkaline regulated by Rim101; repressed during chlamydospore formation; rat catheter, flow model biofilm induced
C6_00480C_A	FET31	-1.98	0.26	-7.47	7.79879e-14	6.75443e-12	Putative multicopper oxidase; ketoconazole/caspofungin/amphotericin B repressed; Sef1/Sfu1/Hap43 regulated; reports differ if functional homolog of ScFet3; rat catheter and Spider biofilm induced
C3_05250C_A		-1.97	0.45	-4.33	1.47633e-05	0.000370695	Protein of unknown function; role in intracellular signal transduction; Spider biofilm induced
C1_04660W_A	DUR1,2	-1.96	0.26	-7.49	6.90857e-14	6.07142e-12	Urea amidolyase; hydrolyzes urea to CO2; use of urea as N source and for hyphal switch in macrophage; regulated by Nrg1/Hap43; required for virulence; promotes mouse kidney and brain colonization; rat catheter and flow model biofilm induced
C1_10450W_A	GLY1	-1.94	0.23	-8.26	1.48872e-16	1.77932e-14	L-threonine aldolase; complements glycine auxotrophy of S. cerevisiae shm1 shm2 gly1-1 triple mutant; macrophage/pseudohyphal-induced; the GLY1 locus has an RFLP and is triploid in strain SGY269; flow model biofilm induced
C7_00730W_A	MET28	-1.94	0.41	-4.7	2.57931e-06	7.94534e-05	Predicted bZIP domain-containing transcription factor; protein induced during the mating process; possibly essential, disruptants not obtained by UAU1 method; Hap43-repressed; rat catheter biofilm induced
C1_13670W_A	OSM2	-1.9	0.27	-7.06	1.71754e-12	1.25171e-10	Putative mitochondrial fumarate reductase; regulated by Ssn6p, Gcn2p, and Gcn4p; Hog1p-downregulated; stationary phase enriched protein; Hap43p-repressed gene
C2_07570W_A	RNR22	-1.9	0.23	-8.3	1.01093e-16	1.25861e-14	Putative ribonucleoside diphosphate reductase;colony morphology-related gene regulation by Ssn6; transcript regulated by tyrosol and cell density; Hap43-repressed; Spider biofilm induced
C4_00450C_A	PGA10	-1.9	0.57	-3.34	0.000823729	0.0107952	GPI anchored membrane protein; utilization of hemin and hemoglobin for Fe in host; Rim101 at ph8/hypoxia/ketoconazole/ciclopirox/hypha-induced; required for RPMI biofilm formation, Bcr1-induced in a/a biofilm; rat catheter biofilm repressed
CR_09920W_A		-1.9	0.3	-6.33	2.38947e-10	1.39995e-08	Predicted amino acid transport domain; transcript upregulated in clinical strains from HIV+ patients with oral candidiasis; alkaline upregulated by Rim101; rat catheter, Spider and flow model biofilm induced
C1_13140C_A	TYE7	-1.86	0.16	-11.39	4.64622e-30	1.98327e-27	bHLH transcription factor; control of glycolysis; required for biofilm formation; hyphally regulated by Cph1, Cyr1; flucytosine, Hog1 induced; amphotericin B, caspofungin repressed; induced in flow model biofilm and planktonic cultures
C3_00800W_A	MIH1	-1.86	0.29	-6.36	1.97201e-10	1.17847e-08	Putative protein phosphatase of the PTP family (tyrosine-specific); ortholog of S. cerevisiae Mih1; mRNA binds She3
C7_04230W_A	NRG1	-1.86	0.21	-8.78	1.66894e-18	2.4934e-16	Transcription factor/repressor; regulates chlamydospore formation/hyphal gene induction/virulence and rescue/stress response genes; effects both Tup1 dependent and independent regulation; flow model biofilm induced; Spider biofilm repressed
C7_01800C_A	PFK2	-1.84	0.15	-12.27	1.2893e-34	8.56098e-32	Phosphofructokinase beta subunit; fructose 2,6-bisphosphate, AMP activated; ATP inhibited; phagocytosis, hyphal repressed; fluconazole-induced; stationary-phase enriched; flow model biofilm induced; rat catheter/Spider biofilm repressed
C4_00370W_A	HOF1	-1.83	0.39	-4.73	2.24861e-06	7.03544e-05	Ortholog of S. cerevisiae Hof1; a protein localized to the bud neck and required for cytokinesis in S. cerevisiae; periodic mRNA expression, peak at cell-cycle G2/M phase; mutant is viable
C2_08120W_A	MAF1	-1.82	0.34	-5.4	6.76583e-08	2.82745e-06	Putative negative regulator of RNA polymerase III; decreased expression in hyphae vs yeast cells; caspofungin repressed; Spider biofilm repressed
C2_02680W_A	PDR17	-1.81	0.43	-4.17	3.02754e-05	0.000677625	Fungal-specific protein (no human or murine homolog); role in sensitivity to fluconazole, specifically
C3_01540W_A		-1.8	0.25	-7.17	7.74338e-13	5.93262e-11
C4_02610C_A	SUL2	-1.8	0.49	-3.63	0.00028152	0.00458409	Putative sulfate transporter; transcript negatively regulated by Sfu1; amphotericin B induced; F-12/CO2 and Spider biofilm induced
C7_01490W_A		-1.8	0.49	-3.68	0.000234042	0.00392876	Protein of unknown function; Spider biofilm induced
C2_10240W_A	GPD1	-1.79	0.23	-7.66	1.88042e-14	1.70264e-12	Glycerol-3-phosphate dehydrogenase; glycerol biosynthesis; regulated by Efg1; regulated by Tsa1, Tsa1B under H2O2 stress conditions; Sflow model and Spider biofilm induced
C4_04230W_A		-1.79	0.34	-5.31	1.12521e-07	4.54342e-06	Putative transporter; fungal-specific; Spider biofilm induced
C7_00310C_A		-1.79	0.4	-4.53	5.86412e-06	0.000160752	Protein of unknown function; induced by nitric oxide; Spider biofilm repressed
C1_05520W_A		-1.78	0.51	-3.5	0.00046091	0.00680098	Protein of unknown function; induced by Sfu1; Spider biofilm induced
C4_03890W_A	PTP2	-1.78	0.45	-4	6.45861e-05	0.00130746	Predicted protein tyrosine phosphatase; involved in regulation of MAP kinase Hog1 activity; induced by Mnl1 under weak acid stress; rat catheter and Spider biofilm induced
C1_02980W_A	GOR1	-1.77	0.26	-6.81	9.9185e-12	6.81298e-10	Ortholog(s) have glyoxylate reductase activity, role in glyoxylate catabolic process and extracellular region localization
C4_05440C_A		-1.77	0.46	-3.86	0.00011329	0.00213927	Protein of unknown function; Spider biofilm induced
C6_03370W_A		-1.77	0.22	-7.99	1.33569e-15	1.40036e-13	Protein of unknown function; Plc1-regulated; induced by Mnl1 under weak acid stress; flow model biofilm induced
C2_06020W_A	CNT	-1.76	0.24	-7.25	4.3134e-13	3.48336e-11	CNT family H(+)/nucleoside symporter; transports adenosine, uridine, inosine, guanosine, tubercidin; variant alleles for high/low-affinity isoforms; S or G at residue 328 affects specificity; Spider, flow model biofilm induced
C3_01100W_A		-1.76	0.5	-3.52	0.000437924	0.00659202	Ortholog of C. dubliniensis CD36 : Cd36_81000, C. parapsilosis CDC317 : CPAR2_103050, Candida tenuis NRRL Y-1498 : CANTEDRAFT_116326 and Debaryomyces hansenii CBS767 : DEHA2G01958g
C2_06170C_A	ECM17	-1.75	0.18	-9.53	1.6073e-21	3.00163e-19	Putative sulfite reductase beta subunit; role in cell wall biogenesis; regulated by Tsa1/Tsa1B in H2O2 stress; Gcn4-regulated; Tbf1-activated; Hap43-repressed; Spider, flow, F-12/CO2 model biofilm induced
C1_04770C_A	ERG3	-1.74	0.27	-6.34	2.22584e-10	1.31699e-08	C-5 sterol desaturase; introduces C-5(6) double bond into episterol; some clinical isolates show increased azole resistance and defects in hyphal growth and virulence; Efg1p-repressed; fluconazole-induced
C2_01380W_A	PLB4.5	-1.72	0.22	-7.78	7.28353e-15	6.69636e-13	Phospholipase B; Hog1-induced; regulated by Ssn6; putative GPI-anchor; repressed during cell wall regeneration; clade-associated gene expression; Hap43-induced; rat catheter and Spider biofilm repressed
C5_04110W_A	SCW11	-1.72	0.26	-6.58	4.82578e-11	3.06797e-09	Cell wall protein; repressed in ace2 mutant; repressed in core caspofungin response; induced in high iron; possibly an essential gene, disruptants not obtained by UAU1 method; rat catheter and Spider biofilm repressed
C1_05540C_A		-1.69	0.27	-6.21	5.2602e-10	2.93785e-08	Protein similar to GTPase regulators; induced in low iron; transcript activated by Mnl1 under weak acid stress; Hap43-, Sfu1- and Sef1-regulated; flow model biofilm induced, Spider biofilm induced
C5_02790C_A	GAP1	-1.69	0.24	-6.96	3.45243e-12	2.45616e-10	Amino acid permease; antigenic in human/mouse; 10-12 transmembrane regions; regulated by nitrogen source; alkaline, GlcNAc, phagocytosis induced; WT virulence in mice; Spider and flow model biofilm induced
C5_03870C_A		-1.69	0.38	-4.51	6.59948e-06	0.000178455	Protein of unknown function; Spider biofilm induced
	MEP1	-1.67	0.23	-7.41	1.26717e-13	1.06656e-11	Ammonium permease; Mep1 more efficient permease than Mep2, Mep2 has additional regulatory role; 11 predicted transmembrane regions; low mRNA abundance; hyphal downregulated; flow model biofilm induced
C4_05900C_A		-1.66	0.36	-4.6	4.13534e-06	0.000119965	Protein of unknown function; Rgt1, Hap43-repressed; flow model biofilm induced; Spider biofilm induced
C3_04550C_A	CMK1	-1.63	0.22	-7.47	8.17635e-14	6.98027e-12	Putative calcium/calmodulin-dependent protein kinase II; expression regulated upon white-opaque switching; biochemically purified Ca2+/CaM-dependent kinase is soluble, cytosolic, monomeric, and serine-autophosphorylated; Hap43p-repressed
C1_11870W_A	MUP1	-1.62	0.23	-7.21	5.51412e-13	4.33584e-11	High affinity methionine permease; required for morphogenesis; alkaline upregulated by Rim101; Spider biofilm induced
C5_04880C_A	PUT2	-1.62	0.37	-4.32	1.58492e-05	0.000393007	Putative delta-1-pyrroline-5-carboxylate dehydrogenase; alkaline upregulated; protein present in exponential and stationary growth phase yeast cultures; flow model biofilm induced; Spider biofilm induced
C2_08490W_A	DSE1	-1.61	0.32	-5.07	3.92883e-07	1.43163e-05	Essential cell wall protein involved in cell wall integrity and rigidity; periodic mRNA expression peaks at M/G1 phase; Ace2p-induced; required for virulence in a mouse model of infection
C4_07080C_A		-1.61	0.36	-4.42	9.921e-06	0.000257773	Protein with t-SNARE domains and a microtubule associated domain; Hap43-induced gene; repressed by alpha pheromone in SpiderM medium
C1_08070W_A	CDR4	-1.6	0.2	-7.87	3.57655e-15	3.39262e-13	Putative ABC transporter superfamily; fluconazole, Sfu1, Hog1, core stress response induced; caspofungin repressed; fluconazole resistance not affected by mutation or correlated with expression; rat catheter and flow model biofilm induced
C4_01750C_A	FBA1	-1.6	0.2	-7.95	1.86988e-15	1.89396e-13	Fructose-bisphosphate aldolase; glycolytic enzyme; antigenic in murine/human infection; regulated by yeast-hypha switch; induced by Efg1, Gcn4, Hog1, fluconazole; phagocytosis-repressed; flow model biofilm induced; Spider biofilm repressed
C6_00960W_A	CAN1	-1.6	0.22	-7.19	6.36339e-13	4.93865e-11	Basic amino acid permease; complements lysine transport mutation; 10 predicted transmembrane regions, 3 predicted N-glycosylation sites; phagocytosis by macrophages induces transcript; rat catheter, Spider and flow model biofilm induced
CR_10110W_A	CHT3	-1.6	0.32	-4.96	6.96565e-07	2.40617e-05	Major chitinase; secreted; functional homolog of S. cerevisiae Cts1p; 4 N-glycosylation motifs; possible O-mannosylation; putative signal peptide; hyphal-repressed; farnesol upregulated in biofilm; regulated by Efg1p, Cyr1p, Ras1p
C7_01520W_A	FLU1	-1.59	0.31	-5.14	2.79371e-07	1.05001e-05	Multidrug efflux pump of the plasma membrane; MDR family member of the MFS (major facilitator superfamily) of transporters; involved in histatin 5 efflux; fungal-specific (no human/murine homolog)

## Sheet: ubp8 mutant
Table S6. RNA Seq analysis of ubp8 mutant
TOP UPREGULATED GENES
ORF	Gene Names	log2foldchange	lfcSE	stat	pvalue	padj	Description
C1_05690C_A		3.76	3.99	0.94	0.346884	0.999792	Protein of unknown function; Spider biofilm induced
C4_00290C_A		3.76	3.99	0.94	0.346884	0.999792	Has domain(s) with predicted 2 iron, 2 sulfur cluster binding, iron ion binding, oxidoreductase activity, oxidoreductase activity and acting on paired donors, more
C1_01990W_A	HSP30	3.57	4.19	0.85	0.394682	0.999792	Putative heat shock protein; fluconazole repressed; amphotericin B induced; Spider biofilm induced; rat catheter biofilm induced
C2_00660C_A	SOD4	3.57	4.19	0.85	0.394682	0.999792	Cu-containing superoxide dismutase; role in response to host innate immune ROS; regulated on white-opaque switch; ciclopirox olamine induced; caspofungin repressed; SOD1,4,5,6 gene family; yeast-associated; Spider biofilm induced
C1_04440W_A		3.15	4.71	0.67	0.50343	0.999792	Ortholog of Candida albicans WO-1 : CAWG_00951
C2_07710W_A		3.08	4.84	0.64	0.524899	0.999792	Ortholog of C. dubliniensis CD36 : Cd36_21990, C. parapsilosis CDC317 : CPAR2_103660, Debaryomyces hansenii CBS767 : DEHA2F19756g and Pichia stipitis Pignal : PICST_61375
CR_06500C_A		2.9	0.75	3.89	0.000101469	0.307604	Protein of unknown function; Hap43-induced; regulated by Nrg1, Tup1; repressed by alpha pheromone in SpiderM medium; Spider biofilm induced; Bcr1-repressed in RPMI a/a biofilms
CR_07740W_A		2.86	1.26	2.27	0.023095	0.999792	Ortholog of C. dubliniensis CD36 : Cd36_00150 and Lodderomyces elongisporus NRLL YB-4239 : LELG_01269
C4_01330W_A		2.78	0.79	3.54	0.000394111	0.796499	Protein of unknown function; Spider biofilm induced
C5_03520W_A		2.76	4.86	0.57	0.569686	0.999792	Predicted ORF from Assembly 19; removed from Assembly 20; subsequently reinstated in Assembly 21 based on comparative genome analysis
C4_01340W_A		2.6	0.55	4.74	2.1656e-06	0.01313	Protein similar to GPI-linked cell-wall proteins; induced in low iron; Spider biofilm induced; regulated in Spider biofilms by Bcr1, Tec1, Ndt80, Brg1
C4_00930W_A	tG(GCC)4	2.56	4.87	0.53	0.599189	0.999792	tRNA-Gly, predicted by tRNAscan-SE; GCC anticodon
C7_00480W_A	FGR2	2.56	4.87	0.53	0.599189	0.999792	Protein similar to phosphate transporters; transposon mutation affects filamentous growth; expression is regulated upon white-opaque switching
C3_00020W_A		2.5	1.99	1.26	0.209444	0.999792	Sef1p-, Sfu1p-, and Hap43p-regulated gene
C2_10780C_A	PSO2	2.29	1.66	1.38	0.168067	0.999792	Putative DNA cross-link repair protein; expressed in opaque or white MTLa/MTLa or MTLalpha/MTLalpha, but not MTLa/MTLalpha cells; telomere-proximal gene; mutation does not affect white-to-opaque phenotypic switching
C2_08470C_A	STN1	2.22	1.56	1.43	0.153113	0.999792	Protein involved in telomere maintenance; forms a complex with Ten1p
C2_05620W_A	KTI11	1.95	1.99	0.98	0.325593	0.999792	Zn-ribbon protein; required for synthesis of diphthamide on translation factor eEF2; involved in modification of wobble nucleosides in tRNAs; rat catheter and Spider biofilm induced
CR_01220W_A		1.83	3.02	0.6	0.54533	0.999792	Putative transporter; mutation confers hypersensitivity to toxic ergosterol analog; fungal-specific (no human or murine homolog)
C4_05990W_A	tS(UGA)2	1.78	4.93	0.36	0.717305	0.999792	tRNA-Ser, predicted by tRNAscan-SE; UGA anticodon
CR_08750C_A	tG(GCC)6	1.78	4.93	0.36	0.717305	0.999792	tRNA-Gly, predicted by tRNAscan-SE; GCC anticodon
C6_03670C_A		1.7	2.77	0.61	0.539775	0.999792	Protein of unknown function; Spider biofilm induced
CR_03440W_A		1.6	1.26	1.27	0.202746	0.999792	Ortholog(s) have DNA 5'-adenosine monophosphate hydrolase activity, DNA-3'-diphospho-5'-guanosine diphosphatase, GMP binding, double-stranded DNA binding, guanosine binding and mismatched DNA binding, more
TOP DOWNREGULATED GENES
ORF	Gene Names	log2foldchange	lfcSE	stat	pvalue	padj	Description
C6_01490C_A		-5.78	2.35	-2.46	0.0138906	0.999792	Ortholog of Candida albicans WO-1 : CAWG_05215
CR_04610C_A		-5.4	2.55	-2.12	0.0343735	0.999792	Ortholog of a S. cerevisiae Atg22; a vacuolar integral membrane protein required for efflux of amino acids during autophagic body breakdown in the vacuole; possibly an essential gene, disruptants not obtained by UAU1 method
C1_09550W_A		-3.82	2.47	-1.55	0.121615	0.999792	Protein of unknown function; transcript detected on high-resolution tiling arrays; rat catheter biofilm induced
C3_04350C_A		-1.99	2.49	-0.8	0.424771	0.999792	Has domain(s) with predicted oxidoreductase activity and role in metabolic process
C3_04600C_A		-1.73	3.48	-0.5	0.619628	0.999792	Ortholog of Candida albicans WO-1 : CAWG_02773
C3_05130C_A	THI4	-1.59	2.1	-0.76	0.448315	0.999792	Thiamine biosynthetic enzyme precursor; repressed during the mating process; stationary phase enriched protein; Spider biofilm induced
C4_00720W_A	CSP2	-1.53	1.35	-1.13	0.257186	0.999792	Putative cell wall associated protein; C. albicans and C. dubliniensis specific gene highly induced during chlamydospore development in both species; localized to chlamydospore cell wall; Hap43-repressed; Spider biofilm induced
C1_06000W_A		-1.47	2.45	-0.6	0.547448	0.999792	Putative dicarboxylic amino acid permease; fungal-specific (no human or murine homolog); induced by alpha pheromone in SpiderM medium
CR_00050W_A	INO2	-1.35	0.77	-1.75	0.0800635	0.999792	Transcriptional activator that forms a heterodimer with Ino4p; likely regulates genes involved in phosphatidylcholine and phosphatidylinositol biosynthesis, fatty acid beta-oxidation, and peroxisome biogenesis
C2_02060C_A	FMO1	-1.3	1.59	-0.82	0.414652	0.999792	Putative oxidoreductase; mutation confers hypersensitivity to toxic ergosterol analog, and to amphotericin B
C2_04970W_A	ABP2	-1.26	0.78	-1.62	0.105317	0.999792	Putative alpha-actinin-like protein; induced by alpha pheromone in SpiderM medium
C1_14190C_A		-0.96	0.75	-1.28	0.201	0.999792	Protein phosphatase inhibitor; Hap43-repressed; homozygous Tn insertion decreases colony wrinkling but does not block hyphal growth in liquid media; mutation confers hypersensitivity to toxic ergosterol analog; Spider biofilm induced
C6_03910C_A		-0.95	0.82	-1.15	0.250798	0.999792	Ortholog(s) have U2 snRNA binding activity, role in RNA folding, U2-type prespliceosome assembly and U2 snRNP, U2-type spliceosomal complex localization
C6_02400W_A		-0.91	2.26	-0.4	0.687814	0.999792	C/D box small nucleolar RNA (snoRNA)
CR_05420W_A		-0.85	2.2	-0.39	0.699425	0.999792	Dubious open reading frame
C3_06490W_A		-0.8	0.61	-1.31	0.190507	0.999792	Putative protein of unknown function; Hap43p-repressed gene; ortholog of S. cerevisiae YJL218W
